# Supplementary material
Source: publisher figshare collection journal article supplement (https://gsapubs.figshare.com/ndownloader/files/38066772)
Supplement: Supplementary file 1 [file 38066772]

## Sheet: TABLE A1
APPENDIX TABLE 1. SECTION SUMMARY FOR EL KEF HOLES A, B, C, D, E AND T
Hole	Core	Type	Section	Curated length	Curated top depth	Curated bottom depth	Composite top depth
				(m)	(mbs)	(mbs)	(mcd)
A	1	R	1	1.5	0	1.5	0
A	2	R	1	1.5	1.5	3	1.5
A	3	R	1	1.5	3	4.5	3
A	4	R	1	1.5	4.5	6	4.5
A	5	R	1	1.5	6	7.5	6
A	6	R	1	1.2	7.5	8.7	7.5
A	7	R	1	1	8.7	9.7	8.72
A	7	R	CC	0.04	9.7	9.74	9.72
A	8	R	1	1.4	9.74	11.14	10.37
A	8	R	CC	0.1	11.14	11.24	11.77
A	9	R	1	1.2	11.24	12.44	12.15
A	9	R	CC	0.1	12.44	12.54	13.35
A	10	R	CC	0.2	12.54	12.74	13.52
A	11	R	1	0.64	12.74	13.38	13.42
A	11	R	2	0.46	13.38	13.84	14.06
A	11	R	CC	0.15	13.84	13.99	14.52
A	12	R	1	1.2	13.99	15.19	14.62
A	12	R	CC	0.2	15.19	15.39	15.82
A	13	R	1	1.26	15.39	16.65	56.87
A	13	R	CC	0.1	16.65	16.75	58.13
A	14	R	1	0.85	16.75	17.6	58.23
A	14	R	CC	0.08	17.6	17.68	59.08
A	15	R	1	1.2	17.68	18.88	59.16
A	15	R	CC	0.1	18.88	18.98	60.36
A	16	R	1	1.5	18.98	20.48	60.38
A	16	R	CC	0.1	20.48	20.58	61.88
A	17	R	1	1.4	20.58	21.98	61.96
A	17	R	CC	0.1	21.98	22.08	63.36
A	18	R	1	1.5	22.08	23.58	63.39
A	18	R	CC	0.1	23.58	23.68	64.89
A	19	R	1	1.5	23.68	25.18	65.04
A	19	R	CC	0.1	25.18	25.28	66.54
A	20	R	1	1.5	25.28	26.78	66.68
A	20	R	CC	0.1	26.78	26.88	68.18
A	21	R	1	1.5	26.88	28.38	68.28
A	21	R	CC	0.04	28.38	28.42	69.78
A	22	R	1	1.5	28.32	29.82	69.84
A	22	R	CC	0.1	29.82	29.92	71.34
A	23	R	1	1.5	29.92	31.42	71.44
A	23	R	CC	0.1	31.42	31.52	72.94
A	24	R	1	1.5	31.52	33.02	73.04
A	24	R	CC	0.1	33.02	33.12	74.54
A	25	R	1	1.5	33.12	34.62	74.64
A	25	R	CC	0.1	34.62	34.72	76.14
A	26	R	1	1.5	34.72	36.22	76.24
A	26	R	CC	0.1	36.22	36.32	77.74
B	1	R	1	0.6	0	0.6	4.87
B	2	R	1	1.4	0.6	2	5.47
B	2	R	CC	0.1	2	2.1	6.87
B	3	R	1	1.5	2.1	3.6	6.97
B	3	R	CC	0.1	3.6	3.7	8.47
B	4	R	1	1.5	3.7	5.2	8.57
B	4	R	CC	0.1	5.2	5.3	10.07
B	5	R	1	1.5	5.3	6.8	10.17
B	5	R	CC	0.1	6.8	6.9	11.67
B	6	R	1	1.5	6.9	8.4	11.77
B	6	R	CC	0.1	8.4	8.5	13.27
B	7	R	1	1.5	8.5	10	13.37
B	7	R	CC	0.1	10	10.1	14.87
B	8	R	1	1.5	10.1	11.6	14.83
B	8	R	CC	0.1	11.6	11.7	16.33
B	9	R	1	1.5	11.7	13.2	16.28
B	9	R	CC	0.1	13.2	13.3	17.78
B	10	R	1	1.5	13.3	14.8	17.92
B	10	R	CC	0.1	14.8	14.9	19.42
B	11	R	1	1.5	14.9	16.4	19.7
B	11	R	CC	0.1	16.4	16.5	21.2
B	12	R	1	1.5	16.5	18	21.23
B	12	R	CC	0.1	18	18.1	22.73
B	13	R	1	1.5	18.1	19.6	22.76
B	13	R	CC	0.1	19.6	19.7	24.26
B	14	R	1	1.5	19.7	21.2	24.31
B	14	R	CC	0.1	21.2	21.3	25.81
B	15	R	1	1.5	21.3	22.8	25.8
B	15	R	CC	0.1	22.8	22.9	27.3
B	16	R	1	1.5	22.9	24.4	27.36
B	16	R	CC	0.1	24.4	24.5	28.86
B	17	R	1	1.5	24.5	26	29.43
B	17	R	CC	0.1	26	26.1	30.93
B	18	R	1	1.5	26.1	27.6	31.01
B	18	R	CC	0.1	27.6	27.7	32.51
B	19	R	1	1.5	27.7	29.2	32.52
B	19	R	CC	0.1	29.2	29.3	34.02
B	20	R	1	1.5	29.3	30.8	34.12
B	20	R	CC	0.1	30.8	30.9	35.62
B	21	R	1	1.5	30.9	32.4	35.67
B	21	R	CC	0.1	32.4	32.5	37.17
B	22	R	1	1.5	32.5	34	37.36
B	22	R	CC	0.1	34	34.1	38.86
B	23	R	1	1.5	34.1	35.6	38.91
B	23	R	CC	0.1	35.6	35.7	40.41
C	1	R	1	0.67	0	0.67	13.35
C	2	R	1	1.43	0.6	2.03	13.85
C	2	R	CC	0.1	2	2.1	15.25
C	3	R	1	1.5	2.1	3.6	15.3
C	3	R	CC	0.1	3.6	3.7	16.8
C	4	R	1	1.5	3.7	5.2	16.82
C	4	R	CC	0.1	5.2	5.3	18.32
C	5	R	1	1.5	5.3	6.8	18.41
C	5	R	CC	0.1	6.8	6.9	19.91
C	6	R	1	1.5	6.9	8.4	19.85
C	6	R	CC	0.1	8.4	8.5	21.35
C	7	R	1	1.5	8.5	10	21.43
C	7	R	CC	0.1	10	10.1	22.93
C	8	R	1	1.5	10.1	11.6	23.02
C	8	R	CC	0.1	11.6	11.7	24.52
C	9	R	1	1.5	11.7	13.2	24.69
C	9	R	CC	0.1	13.2	13.3	26.19
C	10	R	1	1.5	13.3	14.8	26.19
C	10	R	CC	0.1	14.8	14.9	27.69
C	11	R	1	1.5	14.9	16.4	28.19
C	11	R	CC	0.1	16.4	16.5	29.69
C	12	R	1	1.5	16.5	18	29.64
C	12	R	CC	0.1	18	18.1	31.14
C	13	R	1	1.5	18.1	19.6	31.55
C	13	R	CC	0.1	19.6	19.7	33.05
C	14	R	1	1.5	19.7	21.2	33.04
C	14	R	CC	0.1	21.2	21.3	34.54
C	15	R	1	1.5	21.3	22.8	34.63
C	15	R	CC	0.1	22.8	22.9	36.13
C	16	R	1	1.4	22.9	24.3	36.27
C	16	R	CC	0.1	24.3	24.4	37.67
C	17	R	1	1.5	24.4	25.9	37.82
C	17	R	CC	0.1	25.9	26	39.32
C	18	R	1	1.5	26	27.5	39.6
C	18	R	CC	0.1	27.5	27.6	41.1
C	19	R	1	1.5	27.6	29.1	41.2
C	19	R	CC	0.1	29.1	29.2	42.7
C	20	R	1	1.5	29.2	30.7	42.8
C	20	R	CC	0.1	30.7	30.8	44.3
C	21	R	1	1.5	30.8	32.3	44.4
C	21	R	CC	0.1	32.3	32.4	45.9
C	22	R	1	1.5	32.4	33.9	46
C	22	R	CC	0.1	33.9	34	47.5
C	23	R	1	1.5	34	35.5	47.6
C	23	R	CC	0.1	35.5	35.6	49.1
D	1	R	1	1	4	5	18.88
D	2	R	1	1.32	5	6.32	19.88
D	3	R	1	1.57	6.32	7.89	21.4
D	4	R	1	1.53	7.89	9.42	23.07
D	5	R	1	1.53	9.42	10.95	24.6
D	5	R	CC	0.1	10.95	11.05	26.13
D	6	R	1	1.54	11.05	12.59	26.23
D	6	R	CC	0.1	12.59	12.69	27.77
D	7	R	1	1.53	12.69	14.22	27.87
D	7	R	CC	0.1	14.22	14.32	29.4
D	8	R	1	1.53	14.32	15.85	57.6
D	8	R	CC	0.1	15.85	15.95	59.13
D	9	R	1	1.53	15.95	17.48	59.17
D	9	R	CC	0.1	17.48	17.58	60.7
D	10	R	1	1.53	17.58	19.11	60.74
D	10	R	CC	0.1	19.11	19.21	62.27
D	11	R	1	1.53	19.21	20.74	62.37
D	11	R	CC	0.1	20.74	20.84	63.9
D	12	R	1	1.53	20.84	22.37	63.96
D	12	R	CC	0.1	22.37	22.47	65.49
D	13	R	1	1.53	22.47	24	66.09
D	13	R	CC	0.1	24	24.1	67.62
D	14	R	1	1.1	24.1	25.2	68.2
D	14	R	CC	0.1	25.2	25.3	69.3
D	15	R	1	1.31	25.3	26.61	69.68
D	16	R	1	1.53	26.61	28.14	71.17
E	1	R	1	1.01	4	5.01	46.18
E	2	R	1	1.53	5.01	6.54	47.19
E	2	R	CC	0.1	6.54	6.64	48.72
E	3	R	1	1.5	6.64	8.14	48.82
E	3	R	CC	0.1	8.14	8.24	50.32
E	4	R	1	1.53	8.24	9.77	50.42
E	4	R	CC	0.1	9.77	9.87	51.95
E	5	R	1	1.5	9.87	11.37	52.05
E	5	R	CC	0.1	11.37	11.47	53.55
E	6	R	1	1.54	11.47	13.01	53.65
E	6	R	CC	0.1	13.01	13.11	55.19
E	7	R	1	1.53	13.11	14.64	55.29
E	7	R	CC	0.1	14.64	14.74	56.82
E	8	R	1	1.5	14.74	16.24	56.92
E	8	R	CC	0.1	16.24	16.34	58.42
E	9	R	1	1.5	16.34	17.84	58.67
E	9	R	CC	0.1	17.84	17.94	60.17
E	10	R	1	1.53	17.94	19.47	60.28
E	10	R	CC	0.1	19.47	19.57	61.81
E	11	R	1	1.02	19.57	20.59	62.06
E	11	R	CC	0.1	20.59	20.69	63.08
E	12	R	1	1.54	20.69	22.23	63.29
E	13	R	1	1.53	22.23	23.76	64.98
E	13	R	CC	0.1	23.76	23.86	66.51
E	14	R	1	1.53	23.86	25.39	67.69
E	15	R	1	1.45	25.39	26.84	69.54
E	16	R	1	0.9	26.84	27.74	71.04
T	1	R	1	1	0	1	25.11
T	2	R	1	1	1	2	26.11
T	3	R	1	1	2	3	27.11
T	4	R	1	1	3	4	28.11
T	5	R	1	1	4	5	29.11
T	6	R	1	1	5	6	30.11
T	7	R	1	1	6	7	31.11
T	8	R	1	1	7	8	32.11
T	9	R	1	1	8	9	33.11
T	10	R	1	1	9	10	34.11
T	11	R	1	1	10	11	35.11
T	12	R	1	1	11	12	36.11
T	13	R	1	1	12	13	37.11
T	14	R	1	1	13	14	38.11
T	15	R	1	1	14	15	39.11
T	16	R	1	1	15	16	40.11
T	17	R	1	1	16	17	41.11
T	18	R	1	1	17	18	42.11
T	19	R	1	1	18	19	43.11
T	20	R	1	1	19	20	44.11
T	21	R	1	1	20	21	45.11
T	22	R	1	1	21	22	46.11
T	23	R	1	1	22	23	47.11
T	24	R	1	1	23	24	48.11
T	25	R	1	1	24	25	49.11
T	26	R	1	1	25	26	50.11
T	27	R	1	1	26	27	51.11
T	28	R	1	1	27	28	52.11
T	29	R	1	1	28	29	53.11
T	30	R	1	1	29	30	54.11
T	31	R	1	1	30	31	55.11
T	32	R	1	1	31	32	56.11
T	33	R	1	0.97	32	32.97	57.11
T	34	R	1	1	33	34	58.11
T	35	R	1	1	34	35	59.11
T	36	R	1	1	35	36	60.11
T	37	R	1	1	36	37	61.11
T	38	R	1	1	37	38	62.11
T	39	R	1	1	38	39	63.11
T	40	R	1	1	39	40	64.11
T	41	R	1	1	40	41	65.11
T	42	R	1	1	41	42	66.11
T	43	R	1	1	42	43	67.11
T	44	R	1	1	43	44	68.11
T	45	R	1	1	44	45	69.11
T	46	R	1	1	45	46	70.11
T	47	R	1	1	46	47	71.11
T	48	R	1	1	47	48	72.11
T	49	R	1	1	48	49	73.11
T	50	R	1	1	49	50	74.11
T	51	R	1	1	50	51	75.11
T	52	R	1	1	51	52	76.11
T	53	R	1	1	52	53	77.11
T	54	R	1	1	53	54	78.11
T	55	R	1	1	54	55	79.11
T	56	R	1	1	55	56	80.11
T	57	R	1	1	56	57	81.11
T	58	R	1	1	57	58	82.11
T	59	R	1	1	58	59	83.11
T	60	R	1	1	59	60	84.11

## Sheet: TABLE A2
APPENDIX TABLE 2. EL KEF SPLICE
Hole	Core	Section	Interval	Curated depth	Composite depth		Hole	Core	Section	Interval	Curated depth	Composite depth
			(cm)	(mbs)	(mcd)					(cm)	(mbs)	(mcd)
B	1	1	0	0.6	5.47	Tie	B	2	1	0	0.6	5.47
B	2	2	3	2	6.87	Tie	B	3	1	0	2.1	6.97
B	3	2	0	3.6	8.47	Tie	B	4	1	0	3.7	8.57
B	4	2	0	5.2	10.07	Tie	B	5	1	0	5.3	10.17
B	5	2	0	6.8	11.67	Tie	B	6	1	1	6.9	11.77
B	6	2	0	8.4	13.27	Tie	B	7	1	1	8.5	13.37
B	7	1	148	9.98	14.85	Tie	C	2	1	100	1.6	14.85
C	2	1	127	1.87	15.12	Tie	B	8	1	29	10.39	15.12
B	8	1	68	10.78	15.51	Tie	C	3	1	21	2.31	15.51
C	3	1	110	3.2	16.4	Tie	B	9	1	12	11.82	16.4
B	9	1	126	12.96	17.54	Tie	C	4	1	72	4.42	17.54
C	4	1	124	4.94	18.06	Tie	B	10	1	14	13.44	18.06
B	10	1	114	14.44	19.06	Tie	C	5	1	65	5.95	19.06
C	5	1	139	6.69	19.8	Tie	B	11	1	10	15	19.8
B	11	1	128	16.18	20.98	Tie	C	6	1	113	8.03	20.98
C	6	1	141	8.31	21.26	Tie	B	12	1	3	16.53	21.26
B	12	1	46	16.96	21.69	Tie	C	7	1	26	8.76	21.69
C	7	1	145	9.95	22.88	Tie	B	13	1	12	18.22	22.88
B	13	1	76	18.86	23.52	Tie	C	8	1	50	10.6	23.52
C	8	1	145	11.55	24.47	Tie	B	14	1	16	19.86	24.47
B	14	1	139	21.09	25.7	Tie	C	9	1	101	12.71	25.7
C	9	1	126	12.96	25.95	Tie	B	15	1	15	21.45	25.95
B	15	2	0	22.8	27.3	Append	B	16	2	0	22.9	27.36
B	16	1	114	24.04	28.5	Tie	C	11	1	31	15.21	28.5
C	11	1	133	16.23	29.52	Tie	B	17	1	9	24.59	29.52
B	17	2	0	26	30.93	Append	B	18	1	0	26.1	31.01
B	18	1	92	27.02	31.93	Tie	C	13	1	38	18.48	31.93
C	13	1	126	19.36	32.81	Tie	B	19	1	29	27.99	32.81
B	19	1	82	28.52	33.34	Tie	C	14	1	30	20	33.34
C	14	1	135	21.05	34.39	Tie	B	20	1	27	29.57	34.39
B	20	1	138	30.68	35.5	Tie	C	15	1	87	22.17	35.5
C	15	1	121	22.51	35.84	Tie	B	21	1	17	31.07	35.84
B	21	1	135	32.25	37.02	Tie	C	16	1	75	23.65	37.02
C	16	1	115	24.05	37.42	Tie	B	22	1	6	32.56	37.42
B	22	1	73	33.23	38.09	Tie	C	17	1	27	24.67	38.09
C	17	1	124	25.64	39.06	Tie	B	23	1	15	34.25	39.06
B	23	1	122	35.32	40.13	Tie	C	18	1	53	26.53	40.13
C	18	2	10	27.6	41.2	Append	C	19	1	0	27.6	42.7
C	19	2	10	29.2	42.8	Append	C	20	1	0	29.2	44.3
C	20	2	10	30.8	44.4	Append	C	21	1	0	30.8	45.9
C	21	2	10	32.4	46	Append	C	22	1	0	32.4	47.5
C	22	2	10	34	47.6	Append	C	23	1	0	34	49.1
C	23	1	59	34.59	48.19	Tie	E	2	1	100	6.01	48.19
E	2	2	9	6.63	48.81	Append	E	3	1	0	6.64	48.82
E	3	2	10	8.24	50.42	Append	E	4	1	0	8.24	50.42
E	4	2	9	9.86	52.04	Append	E	5	1	0	9.87	52.05
E	5	2	10	11.47	53.65	Append	E	6	1	0	11.47	53.65
E	6	2	10	13.11	55.29	Append	E	7	1	0	13.11	55.29
E	7	2	10	14.65	56.82	Append	E	8	1	0	14.74	56.92
E	8	2	10	16.34	58.42	Append	E	9	1	0	16.34	58.67
E	9	1	120	17.54	59.87	Tie	D	9	1	70	16.65	59.87
D	9	1	138	17.33	60.55	Tie	E	10	1	27	18.21	60.55
E	10	1	57	18.51	60.85	Tie	A	16	1	47	19.45	60.85
A	16	1	110	20.08	61.48	Tie	D	10	1	74	18.32	61.48
D	10	1	131	18.89	62.05	Tie	A	17	1	9	20.67	62.05
A	17	1	116	21.74	63.12	Tie	D	11	1	75	19.96	63.12
D	11	1	140	20.61	63.77	Tie	A	18	1	38	22.46	63.77
A	18	1	124	23.32	64.63	Tie	D	12	1	67	21.51	64.63
D	12	1	127	22.11	65.23	Tie	A	19	1	19	23.87	65.23
A	19	1	129	24.97	66.33	Tie	D	13	1	24	22.71	66.33
D	13	1	76	23.23	66.85	Tie	A	20	1	17	25.45	66.85
A	20	1	116	26.44	67.84	Tie	E	14	1	15	24.01	67.84
E	14	1	125	25.11	68.94	Tie	A	21	1	66	27.54	68.94
A	21	1	147	28.35	69.75	Append	A	22	1	2	28.34	69.86
A	22	1	141	29.73	71.25	Tie	D	16	1	8	26.69	71.25
D	16	1	66	27.27	71.83	Tie	A	23	1	39	30.31	71.83
A	23	2	10	31.52	73.03	Append	A	24	1	0	31.52	73.03
A	24	2	10	33.12	74.64	Append	A	25	1	0	33.12	74.64
A	25	2	10	34.72	76.24	Append	A	26	1	0	34.72	76.24
A	26	2	10	36.32	77.84	end

## Sheet: TABLE A3
APPENDIX TABLE 3. OFFSETS TO CONVERT EL KEF CORE/SAMPLE DEPTH IN MBS TO MCD
Core	Offset
	(m)
A1	0
A2	0
A3	0
A4	0
A5	0
A6	0
A7	0.02
A8	0.63
A9	0.91
A10	0.98
A11	0.68
A12	0.63
A13	41.48
A14	41.48
A15	41.48
A16	41.4
A17	41.38
A18	41.31
A19	41.36
A20	41.4
A21	41.4
A22	41.52
A23	41.52
A24	41.52
A25	41.52
A26	41.52
B1	4.87
B2	4.87
B3	4.87
B4	4.87
B5	4.87
B6	4.87
B7	4.87
B8	4.73
B9	4.58
B10	4.62
B11	4.8
B12	4.73
B13	4.66
B14	4.61
B15	4.5
B16	4.46
B17	4.93
B18	4.91
B19	4.82
B20	4.82
B21	4.77
B22	4.86
B23	4.81
B24	4.81
C1	13.35
C2	13.25
C3	13.2
C4	13.12
C5	13.11
C6	12.95
C7	12.93
C8	12.92
C9	12.99
C10	12.89
C11	13.29
C12	13.14
C13	13.45
C14	13.34
C15	13.33
C16	13.37
C17	13.42
C18	13.6
C19	13.6
C20	13.6
C21	13.6
C22	13.6
C23	13.6
C24	13.6
D1	14.88
D2	14.88
D3	15.08
D4	15.18
D5	15.18
D6	15.18
D7	15.18
D8	43.28
D9	43.22
D10	43.16
D11	43.16
D12	43.12
D13	43.62
D14	44.1
D15	44.38
D16	44.56
E1	42.18
E2	42.18
E3	42.18
E4	42.18
E5	42.18
E6	42.18
E7	42.18
E8	42.18
E9	42.33
E10	42.34
E11	42.49
E12	42.6
E13	42.75
E14	43.83
E15	44.15
E16	44.2
T1	25.11
T2	25.11
T3	25.11
T4	25.11
T5	25.11
T6	25.11
T7	25.11
T8	25.11
T9	25.11
T10	25.11
T11	25.11
T12	25.11
T13	25.11
T14	25.11
T15	25.11
T16	25.11
T17	25.11
T18	25.11
T19	25.11
T20	25.11
T21	25.11
T22	25.11
T23	25.11
T24	25.11
T25	25.11
T26	25.11
T27	25.11
T28	25.11
T29	25.11
T30	25.11
T31	25.11
T32	25.11
T33	25.11
T34	25.11
T35	25.11
T36	25.11
T37	25.11
T38	25.11
T39	25.11
T40	25.11
T41	25.11
T42	25.11
T43	25.11
T44	25.11
T45	25.11
T46	25.11
T47	25.11
T48	25.11
T49	25.11
T50	25.11
T51	25.11
T52	25.11
T53	25.11
T54	25.11
T55	25.11
T56	25.11
T57	25.11
T58	25.11
T59	25.11
T60	25.11

## Sheet: TABLE A4
APPENDIX TABLE 4. COLOUMETRIC DATA FOR EL KEF HOLES A, B, C AND E
Hole	Core	Top interval	Bottom interval	Midpoint interval	Curated depth	Composite core depth	TOC	CaCO3
		(cm)	(cm)	(cm)	(mbs)	(mcd)	(weight %)	(weight %)
A	1	47	50	48.5	0.485	0.485	0.1398	59.0655
A	1	86	89	87.5	0.875	0.875	0.0995	69.1223
A	2	78	81	79.5	2.295	2.295	0.15749	74.3845
A	2	116	119	117.5	2.675	2.675	0.14908	66.4602
A	2	133	136	134.5	2.845	2.845	0.0297	76.0387
A	3	36	39	37.5	3.375	3.375	0.11304	79.6203
A	3	94	97	95.5	3.955	3.955	0.16522	77.7179
A	4	36	39	37.5	4.875	4.875	0.1624	89.5525
A	4	83	86	84.5	5.345	5.345	0.54826	77.4185
A	4	141	143	142	5.92	5.92	0.63778	51.6595
A	5	3	6	4.5	6.045	6.045	0.48638	65.3307
A	5	53	56	54.5	6.545	6.545	0.32503	79.1972
A	5	140	143	141.5	7.415	7.415	0.15416	73.4943
A	6	6	9	7.5	7.575	7.575	0.42062	81.1873
A	6	66	69	67.5	8.175	8.175	0.44898	81.9091
A	6	107	110	108.5	8.585	8.585	0.46396	79.0587
A	7	3	6	4.5	8.745	8.765	0.66884	70.0941
A	7	23	26	24.5	8.945	8.965	0.7011	67.5488
A	7	44	47	45.5	9.155	9.175	0.44825	81.0655
A	7	63	66	64.5	9.345	9.365	0.676	64.9548
A	7	83	86	84.5	9.545	9.565	0.58745	67.4784
A	7	100	103	101.5	9.715	9.735	0.36001	75.7613
A	8	6	9	7.5	9.815	10.445	0.57855	63.3126
A	8	31	34	32.5	10.065	10.695	0.58658	62.5485
A	8	43	46	44.5	10.185	10.815	0.69169	57.0764
A	8	58	61	59.5	10.335	10.965	0.4031	69.3239
A	8	83	86	84.5	10.585	11.215	0.32986	74.0307
A	8	103	106	104.5	10.785	11.415	0.19486	86.15
A	8	123	126	124.5	10.985	11.615	0.5967	72.2361
A	8	143	146	144.5	11.185	11.815	0.39793	79.6062
A	9	4	7	5.5	11.295	12.205	0.57973	65.3703
A	9	23	26	24.5	11.485	12.395	0.29363	84.9024
A	9	43	46	44.5	11.685	12.595	0.61978	60.4168
A	9	63	66	64.5	11.885	12.795	0.68051	65.2355
A	9	83	86	84.5	12.085	12.995	0.86739	60.3085
A	9	103	106	104.5	12.285	13.195	0.84481	61.9993
A	9	113	116	114.5	12.385	13.295	0.44276	69.8141
A	10	0	0	0	12.54	13.52	0.38456	77.5685
A	11	6	9	7.5	12.815	13.495	0.51368	60.3843
A	11	26	29	27.5	13.015	13.695	0.74288	53.7528
A	11	46	49	47.5	13.215	13.895	0.64696	62.1005
A	11	69	72	70.5	13.445	14.125	0.69727	61.3815
A	11	80	83	81.5	13.555	14.235	0.64867	62.9359
A	12	4	7	5.5	14.045	14.675	0.76029	61.1831
A	12	23	26	24.5	14.235	14.865	0.98059	58.5425
A	12	43	46	44.5	14.435	15.065	0.90609	58.7791
A	12	63	66	64.5	14.635	15.265	0.47229	53.8652
A	12	83	86	84.5	14.835	15.465	0.53592	65.5045
A	12	103	106	104.5	15.035	15.665	0.44763	68.0459
A	12	123	126	124.5	15.235	15.865	0.31869	63.7929
A	13	3	6	4.5	15.435	56.915	0.56637	52.5767
A	13	23	26	24.5	15.635	57.115	0.38192	65.2454
A	13	43	46	44.5	15.835	57.315	0.4098	63.6695
A	13	63	66	64.5	16.035	57.515	0.48016	41.9177
A	13	83	86	84.5	16.235	57.715	0.22025	68.9878
A	13	103	106	104.5	16.435	57.915	0.302	59.6736
A	13	120	123	121.5	16.605	58.085	0.56563	36.1561
A	14	38	42	40	17.15	58.63	0.76859	27.0034
A	14	49	53	51	17.26	58.74	1.1341	37.7965
A	14	62	66	64	17.39	58.87	1.0392	42.0382
A	14	72	77	74.5	17.495	58.975	1.0177	38.1806
A	14	83	85	84	17.59	59.07	0.89379	27.4249
A	15	1	4	2.5	17.705	59.185	1.111	27.14
A	15	8	12	10	17.78	59.26	1.0861	22.0312
A	15	15	19	17	17.85	59.33	1.0009	22.2411
A	15	20	24	22	17.9	59.38	1.03	21.0491
A	15	25	29	27	17.95	59.43	0.96378	11.1699
A	15	29	33	31	17.99	59.47	1.0477	22.1653
A	15	35	39	37	18.05	59.53	0.93955	22.3381
A	15	41	45	43	18.11	59.59	0.93466	23.3552
A	15	45	49	47	18.15	59.63	1.077	19.0241
A	15	50	54	52	18.2	59.68	0.92471	18.1377
A	15	55	59	57	18.25	59.73	0.98613	11.8533
A	15	60	64	62	18.3	59.78	0.91609	10.9157
A	15	65	69	67	18.35	59.83	0.87388	11.0899
A	15	70	74	72	18.4	59.88	0.93508	13.4814
A	15	74	78	76	18.44	59.92	0.8885	14.0019
A	15	78	82	80	18.48	59.96	0.91576	10.1121
A	15	83	87	85	18.53	60.01	0.81434	10.523
A	15	88	92	90	18.58	60.06	0.76591	11.6936
A	15	94	98	96	18.64	60.12	0.81946	10.8801
A	15	98	102	100	18.68	60.16	0.73018	11.9137
A	15	102	106	104	18.72	60.2	0.65908	13.1957
A	15	110	113	111.5	18.795	60.275	0.61876	15.884
A	15	116	117	116.5	18.845	60.325	0.68721	17.2938
A	16	0	1	0.5	18.985	60.385	0.63269	15.0107
A	16	1	2	1.5	18.995	60.395	0.58601	15.8069
A	16	2	3	2.5	19.005	60.405	0.65008	14.2445
A	16	3	4	3.5	19.015	60.415	0.70503	13.1145
A	16	4	5	4.5	19.025	60.425	0.62713	15.2778
A	16	5	6	5.5	19.035	60.435	0.65101	15.2422
A	16	6	7	6.5	19.045	60.445	0.65592	15.6244
A	16	7	8	7.5	19.055	60.455	0.61405	18.5547
A	16	8	9	8.5	19.065	60.465	0.53481	15.5828
A	16	9	10	9.5	19.075	60.475	0.57151	15.3496
A	16	10	11	10.5	19.085	60.485	0.61477	15.4107
A	16	11	12	11.5	19.095	60.495	0.9769	18.1186
A	16	12	13	12.5	19.105	60.505	0.57438	18.836
A	16	13	14	13.5	19.115	60.515	0.60591	17.0539
A	16	14	15	14.5	19.125	60.525	0.58626	19.2576
A	16	15	17	16	19.14	60.54	0.57154	20.0708
A	16	19.5	21	20.25	19.1825	60.5825	0.59389	14.8441
A	16	21	22	21.5	19.195	60.595	0.59175	15.4601
A	16	22	23	22.5	19.205	60.605	0.50432	17.1971
A	16	23	24	23.5	19.215	60.615	0.56685	16.6071
A	16	24	25	24.5	19.225	60.625	0.55843	17.4678
A	16	27	28	27.5	19.255	60.655	0.57128	16.237
A	16	28	29	28.5	19.265	60.665	0.50487	18.5703
A	16	29	30	29.5	19.275	60.675	0.56	15.4996
A	16	30	31	30.5	19.285	60.685	0.50372	16.968
A	16	31	32	31.5	19.295	60.695	0.5614	13.8386
A	16	33	34	33.5	19.315	60.715	0.53474	15.9908
A	16	34	35	34.5	19.325	60.725	0.59491	15.9027
A	16	36	37	36.5	19.345	60.745	0.55941	19.9878
A	16	37	38	37.5	19.355	60.755	0.5406	20.2202
A	16	38	39	38.5	19.365	60.765	0.52647	20.7736
A	16	40	41	40.5	19.385	60.785	0.48861	21.9928
A	16	41	42	41.5	19.395	60.795	0.56317	19.285
A	16	42	43	42.5	19.405	60.805	0.50191	19.5154
A	16	43	44	43.5	19.415	60.815	0.53179	18.0878
A	16	44	45	44.5	19.425	60.825	0.52716	16.3313
A	16	45	46	45.5	19.435	60.835	0.59209	14.3219
A	16	46	47	46.5	19.445	60.845	0.55669	13.9778
A	16	50	51	50.5	19.485	60.885	0.533	12.5525
A	16	52	53	52.5	19.505	60.905	0.53838	29.6841
A	16	54	55	54.5	19.525	60.925	0.55045	31.8094
A	16	55	56	55.5	19.535	60.935	0.46494	16.4239
A	16	56	57	56.5	19.545	60.945	0.54193	16.6089
A	16	59	60	59.5	19.575	60.975	0.57876	13.3533
A	16	60	61	60.5	19.585	60.985	0.57522	12.7331
A	16	61	62	61.5	19.595	60.995	0.58227	14.9768
A	16	62	63	62.5	19.605	61.005	0.51378	17.6623
A	16	63	64	63.5	19.615	61.015	0.52159	15.8054
A	16	65	66	65.5	19.635	61.035	0.57584	13.5476
A	16	66	67	66.5	19.645	61.045	0.51296	14.4129
A	16	67	68	67.5	19.655	61.055	0.55614	14.4939
A	16	68	69	68.5	19.665	61.065	0.50502	14.1525
A	16	69	70	69.5	19.675	61.075	0.49431	15.2172
A	16	70	71	70.5	19.685	61.085	0.52112	15.063
A	16	71	72	71.5	19.695	61.095	0.52827	14.8518
A	16	72	73	72.5	19.705	61.105	0.56621	11.4695
A	16	73	74	73.5	19.715	61.115	0.54276	11.335
A	16	74	75	74.5	19.725	61.125	0.56892	11.2112
A	16	75	76	75.5	19.735	61.135	0.56938	10.1603
A	16	76	77	76.5	19.745	61.145	0.5941	10.6682
A	16	77	78	77.5	19.755	61.155	0.63699	8.81072
A	16	78	79	78.5	19.765	61.165	0.65571	10.0651
A	16	79	80	79.5	19.775	61.175	0.62008	6.98321
A	16	80	81	80.5	19.785	61.185	0.5946	11.1364
A	16	81	82	81.5	19.795	61.195	0.59914	11.2777
A	16	82	83	82.5	19.805	61.205	0.6502	5.54778
A	16	83	84	83.5	19.815	61.215	0.69196	7.68393
A	16	84	85	84.5	19.825	61.225	0.69141	6.90632
A	16	85	86	85.5	19.835	61.235	0.68658	6.89491
A	16	86	87	86.5	19.845	61.245	0.6225	6.88225
A	16	87	88	87.5	19.855	61.255	0.635	6.674
A	16	88	89	88.5	19.865	61.265	0.57352	10.3973
A	16	89	90	89.5	19.875	61.275	0.67928	5.44299
A	16	90	91	90.5	19.885	61.285	0.63321	8.49318
A	16	91	92	91.5	19.895	61.295	0.6866	8.44162
A	16	92	93	92.5	19.905	61.305	0.61431	7.58105
A	16	93	94	93.5	19.915	61.315	0.61443	7.69084
A	16	94	95	94.5	19.925	61.325	0.60917	7.49642
A	16	95	96	95.5	19.935	61.335	0.61832	6.64801
A	16	96	97	96.5	19.945	61.345	0.62831	6.33405
A	16	98	99	98.5	19.965	61.365	0.62808	7.60712
A	16	99	100	99.5	19.975	61.375	0.63484	8.66203
A	16	100	101	100.5	19.985	61.385	0.64767	7.06076
A	16	101	102	101.5	19.995	61.395	0.71005	6.56779
A	16	102	103	102.5	20.005	61.405	0.68009	8.47003
A	16	103	104	103.5	20.015	61.415	0.71532	9.59349
A	16	104	105	104.5	20.025	61.425	0.798	13.1289
A	16	105	106	105.5	20.035	61.435	0.76208	12.7217
A	16	106	107	106.5	20.045	61.445	0.79369	17.5089
A	16	107	108	107.5	20.055	61.455	0.76675	17.7142
A	16	108	109	108.5	20.065	61.465	0.72014	20.0117
A	16	109	110	109.5	20.075	61.475	0.62228	28.5596
A	16	110	111	110.5	20.085	61.485	0.75957	23.2326
A	16	111	112	111.5	20.095	61.495	0.58426	30.2474
A	16	112	113	112.5	20.105	61.505	0.49548	16.8251
A	16	113	114	113.5	20.115	61.515	0.50121	38.1621
A	16	114	115	114.5	20.125	61.525	0.51171	40.3688
A	16	115	116	115.5	20.135	61.535	0.49917	38.7706
A	16	116	117	116.5	20.145	61.545	0.47644	39.0815
A	16	117	118	117.5	20.155	61.555	0.51283	35.109
A	16	118	119	118.5	20.165	61.565	0.55642	38.0821
A	16	119	120	119.5	20.175	61.575	0.42738	33.3935
A	16	120	121	120.5	20.185	61.585	0.50196	39.4862
A	16	121	122	121.5	20.195	61.595	0.41046	39.8894
A	16	122	123	122.5	20.205	61.605	0.49727	42.7673
A	16	123	124	123.5	20.215	61.615	0.39991	40.2788
A	16	126	127	126.5	20.245	61.645	0.46745	39.682
A	16	127	128	127.5	20.255	61.655	0.42751	42.577
A	16	129	130	129.5	20.275	61.675	0.4915	30.2029
A	16	130	131	130.5	20.285	61.685	0.46184	35.2089
A	16	131	132	131.5	20.295	61.695	0.4671	37.9773
A	16	132	133	132.5	20.305	61.705	0.47445	43.6813
A	16	133	134	133.5	20.315	61.715	0.5016	42.6629
A	16	135	136	135.5	20.335	61.735	0.49187	42.2192
A	16	136	137	136.5	20.345	61.745	0.49478	41.3511
A	16	137	138	137.5	20.355	61.755	0.51878	41.0696
A	16	138	139	138.5	20.365	61.765	0.47621	41.7682
A	16	139	140	139.5	20.375	61.775	0.47749	38.9045
A	16	140	141	140.5	20.385	61.785	0.47092	42.6886
A	16	141	142	141.5	20.395	61.795	0.31717	43.861
A	16	143	144	143.5	20.415	61.815	0.42924	42.1203
A	16	144	145	144.5	20.425	61.825	0.48215	41.8453
A	16	145	146	145.5	20.435	61.835	0.51764	40.7492
A	16	146	147	146.5	20.445	61.845	0.46346	36.8564
A	16	147	148	147.5	20.455	61.855	0.44885	40.7283
A	16	148	149	148.5	20.465	61.865	0.45014	41.4647
A	16	149	150	149.5	20.475	61.875	0.38904	41.5222
A	16	150	151	150.5	20.485	61.885	0.44951	38.0014
A	17	1	4	2.5	20.605	61.985	0.45475	39.1039
A	17	6	9	7.5	20.655	62.035	0.37285	41.1498
A	17	11	14	12.5	20.705	62.085	0.52697	31.4168
A	17	16	19	17.5	20.755	62.135	0.40438	41.1345
A	17	21	24	22.5	20.805	62.185	0.40178	41.3453
A	17	26	29	27.5	20.855	62.235	0.50238	39.99
A	17	31	34	32.5	20.905	62.285	0.50646	40.2717
A	17	39.5	42.5	41	20.99	62.37	0.4803	41.8341
A	17	49	52	50.5	21.085	62.465	0.42835	41.343
A	17	61.5	64.5	63	21.21	62.59	0.46602	45.5183
A	17	73	76	74.5	21.325	62.705	0.41102	44.9335
A	17	80.5	83.5	82	21.4	62.78	0.50053	42.8834
A	17	89	92	90.5	21.485	62.865	0.46334	43.9529
A	17	96	99	97.5	21.555	62.935	0.40383	45.8422
A	17	105	108	106.5	21.645	63.025	0.45169	41.4102
A	17	115	118	116.5	21.745	63.125	0.49041	38.1963
A	17	124.5	125	124.75	21.8275	63.2075	0.41277	37.8576
A	17	136.5	138	137.25	21.9525	63.3325	0.47821	41.2742
A	17	144	146	145	22.03	63.41	0.47648	38.309
A	18	10	11.5	10.75	22.1875	63.4975	0.39956	45.1506
A	18	30	31.5	30.75	22.3875	63.6975	0.42279	46.4182
A	18	50	51.5	50.75	22.5875	63.8975	0.43261	40.1039
A	18	70	71.5	70.75	22.7875	64.0975	0.42832	35.1766
A	18	90	91.5	90.75	22.9875	64.2975	0.45566	35.3787
A	18	110	112	111	23.19	64.5	0.447	29.8439
A	18	130	131.5	130.75	23.3875	64.6975	0.43772	32.2286
A	18	146	147.5	146.75	23.5475	64.8575	0.45451	32.167
A	19	10	11.5	10.75	23.7875	65.1475	0.44614	34.949
A	19	30	31.5	30.75	23.9875	65.3475	0.4666	34.123
A	19	50	51.5	50.75	24.1875	65.5475	0.42478	44.8222
A	19	70	71.5	70.75	24.3875	65.7475	0.42399	51.9801
A	19	90	92	91	24.59	65.95	0.44286	49.179
A	19	99.5	101.5	100.5	24.685	66.045	0.41591	47.6867
A	19	110	111.5	110.75	24.7875	66.1475	0.45483	42.6802
A	19	129	131.5	130.25	24.9825	66.3425	0.47586	37.9635
A	19	147	148.5	147.75	25.1575	66.5175	0.4578	31.2408
A	20	10	11.5	10.75	25.3875	66.7875	0.50014	30.325
A	20	30	31.5	30.75	25.5875	66.9875	0.50871	30.1054
A	20	48.5	50	49.25	25.7725	67.1725	0.52372	25.9794
A	20	70	71.5	70.75	25.9875	67.3875	0.55544	23.9909
A	20	88	91	89.5	26.175	67.575	0.5754	20.6068
A	20	109.5	112	110.75	26.3875	67.7875	0.61178	19.2849
A	20	129	132	130.5	26.585	67.985	0.61249	19.0633
A	20	146.5	149	147.75	26.7575	68.1575	0.57172	26.4168
A	21	12	16	14	27.02	68.42	0.60121	25.5055
A	21	73	77	75	27.63	69.03	0.67375	45.1049
A	21	134	138	136	28.24	69.64	0.66388	51.3121
A	22	58	62	60	28.92	70.44	0.80878	43.3611
A	22	107	109	108	29.4	70.92	0.85211	33.8722
A	22	144	148	146	29.78	71.3	0.7425	28.3145
A	23	52	55	53.5	30.455	71.975	0.62096	30.2066
A	23	111	114	112.5	31.045	72.565	0.48829	39.2769
A	24	53	57	55	32.07	73.59	0.7766	40.8278
A	24	104	108	106	32.58	74.1	0.74025	30.15
A	24	134	138	136	32.88	74.4	0.75381	33.843
A	25	57	61	59	33.71	75.23	0.83253	27.9011
A	25	103	107	105	34.17	75.69	0.76026	26.6622
A	25	127	130	128.5	34.405	75.925	0.78953	27.303
A	26	24	27	25.5	34.975	76.495	0.67262	47.49
A	26	78	81	79.5	35.515	77.035	0.96766	43.9561
A	26	130	133	131.5	36.035	77.555	0.81223	34.2336
B	1	21	23	22	0.22	5.09	0.1189	78.9892
B	2	81	83	82	1.42	6.29	0.16455	76.3715
B	3	95	97	96	3.06	7.93	0.20079	69.4598
B	4	58	60	59	4.29	9.16	0.27579	86.0756
B	5	57	59	58	5.88	10.75	0.66836	62.2762
B	6	55	57	56	7.46	12.33	0.3003	79.7431
B	7	107	109	108	9.58	14.45	0.60786	64.248
B	8	59	61	60	10.7	15.43	0.38015	71.1378
B	9	64	66	65	12.35	16.93	0.45825	69.775
B	10	62	64	63	13.93	18.55	0.62382	60.2224
B	11	61	63	62	15.52	20.32	0.38307	47.3396
B	12	60	62	61	17.11	21.84	0.5998	47.5868
B	13	59	61	60	18.7	23.36	0.45629	57.0989
B	14	59	61	60	20.3	24.91	0.61788	45.9434
B	15	57	59	58	21.88	26.38	0.5887	49.1953
B	16	56	58	57	23.47	27.93	0.59853	54.1089
B	17	57	59	58	25.08	30.01	0.35632	60.5256
B	18	57	59	58	26.68	31.59	0.36703	64.4265
B	19	56	58	57	28.34	33.16	0.39551	64.9364
B	20	55	57	56	29.86	34.68	0.34402	63.6893
B	21	55	57	56	31.46	36.23	0.49337	58.7834
B	22	54	56	55	33.05	37.91	0.61216	44.3951
B	23	56	58	57	34.67	39.48	0.56296	39.7511
C	3	23	26	24.5	2.345	15.545	0.20021	70.0011
C	3	73	76	74.5	2.845	16.045	0.24069	66.2577
C	3	126	129	127.5	3.375	16.575	0.44555	45.2448
C	4	19	22	20.5	3.905	17.025	0.50499	58.6325
C	4	67	70	68.5	4.385	17.505	0.45506	70.5679
C	4	113	116	114.5	4.845	17.965	0.56146	64.9102
C	5	23	26	24.5	5.545	18.655	0.61601	51.6318
C	5	73	76	74.5	6.045	19.155	0.37051	77.5114
C	5	123	126	124.5	6.545	19.655	0.60216	61.9472
C	6	27	30	28.5	7.185	20.135	0.35825	52.297
C	6	81	84	82.5	7.725	20.675	0.54988	52.4992
C	6	133	136	134.5	8.245	21.195	0.40554	70.7822
C	7	32	35	33.5	8.835	21.765	0.43048	65.7655
C	7	83	86	84.5	9.345	22.275	0.5084	52.3132
C	7	128	131	129.5	9.795	22.725	0.47478	54.1976
C	8	36	39	37.5	10.475	23.395	0.60555	50.0504
C	8	83	86	84.5	10.945	23.865	0.55829	51.9035
C	8	123	126	124.5	11.345	24.265	0.55762	47.5083
C	9	33	36	34.5	12.045	25.035	0.62218	45.7927
C	9	83	86	84.5	12.545	25.535	0.47385	48.5085
C	9	133	136	134.5	13.045	26.035	0.56917	47.9269
C	10	23	26	24.5	13.545	26.435	0.63549	51.4953
C	10	73	76	74.5	14.045	26.935	0.52664	48.6985
C	10	133	136	134.5	14.645	27.535	0.47131	55.0496
C	11	28	31	29.5	15.195	28.485	0.44261	55.4644
C	11	79	82	80.5	15.705	28.995	0.30152	66.4891
C	11	123	126	124.5	16.145	29.435	0.27649	65.688
C	12	23	26	24.5	16.745	29.885	0.31849	56.6616
C	12	73	76	74.5	17.245	30.385	0.44565	57.6415
C	12	115	118	116.5	17.665	30.805	0.49473	59.0295
C	13	23	25	24	18.34	31.79	0.45207	58.132
C	13	78	80	79	18.89	32.34	0.46181	50.7296
C	13	138	141	139.5	19.495	32.945	0.37017	66.1871
C	14	22	25	23.5	19.935	33.275	0.32696	54.1237
C	14	73	76	74.5	20.445	33.785	0.37542	65.4386
C	14	123	126	124.5	20.945	34.285	0.36387	67.6607
C	15	22	25	23.5	21.535	34.865	0.29889	70.2586
C	15	70	73	71.5	22.015	35.345	0.48619	56.0143
C	15	126	129	127.5	22.575	35.905	0.48203	56.7079
C	16	20	23	21.5	23.115	36.485	0.44654	60.8628
C	16	81	83	82	23.72	37.09	0.31395	52.4086
C	16	133	136	134.5	24.245	37.615	0.41827	49.5729
C	17	23	26	24.5	24.645	38.065	0.40103	53.6624
C	17	74	77	75.5	25.155	38.575	0.57983	56.4905
C	17	118	121	119.5	25.595	39.015	0.53224	54.3054
C	18	29	31	30	26.3	39.9	0.59936	37.0947
C	18	89	91	90	26.9	40.5	0.61841	42.9686
C	18	144	147	145.5	27.455	41.055	0.51607	57.638
C	19	55	58	56.5	28.165	41.765	0.29958	53.6687
C	19	103	106	104.5	28.645	42.245	0.64125	59.036
C	19	146	149	147.5	29.075	42.675	0.35072	63.3428
C	20	38	41	39.5	29.595	43.195	0.49457	54.1977
C	20	93	96	94.5	30.145	43.745	0.39345	51.6689
C	21	4	7	5.5	30.855	44.455	0.38096	59.7989
C	21	53	56	54.5	31.345	44.945	0.5305	46.2323
C	21	102	105	103.5	31.835	45.435	0.37037	36.6831
C	21	141	144	142.5	32.225	45.825	0.34006	39.058
C	22	53	56	54.5	32.945	46.545	0.46879	65.2598
C	22	109	112	110.5	33.505	47.105	0.26875	42.3093
C	22	143	146	144.5	33.845	47.445	0.55829	55.223
C	23	49	52	50.5	34.505	48.105	0.28506	56.975
C	23	105	108	106.5	35.065	48.665	0.37527	68.2338
C	23	149	150	149.5	35.495	49.095	0.278	51.8734
E	5	10	12	11	9.98	52.16	0.40528	64.4619
E	5	30	31	30.5	10.175	52.355	0.46261	49.2369
E	5	50	51	50.5	10.375	52.555	0.83125	18.6146
E	5	70	72	71	10.58	52.76	0.8206	21.4331
E	5	90	91.5	90.75	10.7775	52.9575	0.75889	24.6327
E	5	110	111.5	110.75	10.9775	53.1575	0.74363	29.6396
E	5	130	131.5	130.75	11.1775	53.3575	0.7298	31.2
E	5	148.5	150	149.25	11.3625	53.5425	0.73554	36.4384
E	6	2	4	3	11.5	53.68	0.69471	40.2646
E	6	20	22	21	11.68	53.86	0.70184	38.9732
E	6	40	42	41	11.88	54.06	0.68036	41.8136
E	6	60	62	61	12.08	54.26	0.79787	42.784
E	6	100	102	101	12.48	54.66	0.95337	42.1817
E	6	120	122	121	12.68	54.86	1.1035	41.7849
E	6	140	142	141	12.88	55.06	1.2404	44.8137
E	7	5	7	6	13.17	55.35	1.4815	46.8404
E	7	25	27	26	13.37	55.55	1.6848	50.3424
E	7	45	47	46	13.57	55.75	1.5588	47.7992
E	7	65	67	66	13.77	55.95	0.93807	47.6987
E	7	85	87	86	13.97	56.15	0.92975	42.0719
E	7	105	107	106	14.17	56.35	0.91684	43.4348
E	7	125	127	126	14.37	56.55	0.87298	46.3475
E	7	146	148	147	14.58	56.76	0.78328	47.6361
E	8	1	2.5	1.75	14.7575	56.9375	0.80716	46.3135
E	8	10	11.5	10.75	14.8475	57.0275	0.95605	43.842
E	8	20	21.5	20.75	14.9475	57.1275	1.1863	41.2527
E	8	30	31.5	30.75	15.0475	57.2275	1.0492	40.8195
E	8	40	41.5	40.75	15.1475	57.3275	0.94094	45.2124
E	8	50	51.5	50.75	15.2475	57.4275	0.97153	41.8922
E	8	60	61.5	60.75	15.3475	57.5275	1.025	40.887
E	8	70	71.5	70.75	15.4475	57.6275	1.0371	44.029
E	8	81	82.5	81.75	15.5575	57.7375	1.0956	41.5026
E	8	90	91.5	90.75	15.6475	57.8275	1.16	39.4209
E	8	100	101.5	100.75	15.7475	57.9275	0.75744	47.5831
E	8	109	110.5	109.75	15.8375	58.0175	1.0456	42.6579
E	8	120	121.5	120.75	15.9475	58.1275	1.1084	41.4234
E	8	130	131.5	130.75	16.0475	58.2275	0.99409	42.3082
E	8	140	141.5	140.75	16.1475	58.3275	1.0243	9.56451
E	9	2	3.5	2.75	16.3675	58.6975	1.0038	11.2863
E	9	10	11.5	10.75	16.4475	58.7775	0.98059	16.9017
E	9	20	21.5	20.75	16.5475	58.8775	0.96929	18.3186
E	9	30	31.5	30.75	16.6475	58.9775	1.0704	20.0053
E	9	40	41.5	40.75	16.7475	59.0775	1.0366	20.79
E	9	50	51.5	50.75	16.8475	59.1775	1.0998	24.2203
E	9	60	61.5	60.75	16.9475	59.2775	1.139	23.0133
E	9	70	72.5	71.25	17.0525	59.3825	1.2956	35.5891
E	9	80	81.5	80.75	17.1475	59.4775	1.0794	27.2483
E	9	90	91.5	90.75	17.2475	59.5775	0.93313	33.0307
E	9	100	101.5	100.75	17.3475	59.6775	1.0405	30.6286
E	9	110	111.5	110.75	17.4475	59.7775	1.0347	33.6557
E	9	120	121.5	120.75	17.5475	59.8775	0.96598	39.9525
E	9	130	132	131	17.65	59.98	1.0519	33.829
E	9	138	140	139	17.73	60.06	0.97331	40.8644
E	10	4	5	4.5	17.985	60.325	0.8077	11.772
E	10	6.5	8	7.25	18.0125	60.3525	0.79085	12.0922
E	10	10	12	11	18.05	60.39	0.78711	11.2579
E	10	14	15	14.5	18.085	60.425	0.77274	11.4742
E	10	16.5	18	17.25	18.1125	60.4525	0.74479	12.7317
E	10	20	22	21	18.15	60.49	0.76723	13.4968
E	10	24	25	24.5	18.185	60.525	0.7237	13.9019
E	10	27	28	27.5	18.215	60.555	0.66949	15.663
E	10	30	32	31	18.25	60.59	0.6502	14.7941
E	10	34	35	34.5	18.285	60.625	0.6726	15.0865
E	10	37	38	37.5	18.315	60.655	0.70497	14.7635
E	10	40	41	40.5	18.345	60.685	0.6471	13.9344
E	10	44	45	44.5	18.385	60.725	0.73274	14.4222
E	10	47	48	47.5	18.415	60.755	0.61682	16.1692
E	10	50	52	51	18.45	60.79	0.61812	17.6411
E	10	54	55	54.5	18.485	60.825	0.63474	14.8529
E	10	57	58	57.5	18.515	60.855	0.62678	15.9913
E	10	60	62	61	18.55	60.89	0.59829	21.1
E	10	64	65	64.5	18.585	60.925	0.63316	17.2818
E	10	67	68	67.5	18.615	60.955	0.68415	15.7691
E	10	70	72	71	18.65	60.99	0.56662	17.3604
E	10	72	73.5	72.75	18.6675	61.0075	0.52333	17.0079
E	10	75	77	76	18.7	61.04	0.54857	19.3658
E	10	78	79	78.5	18.725	61.065	0.56542	17.5861
E	10	80	82	81	18.75	61.09	0.8672	39.0927
E	10	84	86	85	18.79	61.13	0.55289	16.9708
E	10	87	89	88	18.82	61.16	0.54434	14.5247
E	10	90	92	91	18.85	61.19	0.54325	15.9557
E	10	91	92	91.5	18.855	61.195	0.56591	14.5058
E	10	92	93	92.5	18.865	61.205	0.55643	14.0833
E	10	93	94	93.5	18.875	61.215	0.56368	13.648
E	10	94	95	94.5	18.885	61.225	0.58045	11.5899
E	10	95	96	95.5	18.895	61.235	0.58261	11.3246
E	10	96	97	96.5	18.905	61.245	0.6024	9.71778
E	10	97	98	97.5	18.915	61.255	0.63691	9.59025
E	10	98	99	98.5	18.925	61.265	0.66779	8.25928
E	10	99	100	99.5	18.935	61.275	0.65892	6.98204
E	10	100	101	100.5	18.945	61.285	0.66747	7.14572
E	10	101	102	101.5	18.955	61.295	0.65341	5.17535
E	10	102	103	102.5	18.965	61.305	0.65376	6.18036
E	10	103	104	103.5	18.975	61.315	0.67362	8.21071
E	10	104	105	104.5	18.985	61.325	0.66038	8.38514
E	10	105	106	105.5	18.995	61.335	0.63275	7.06092
E	10	106	107	106.5	19.005	61.345	0.63681	7.01044
E	10	107	108	107.5	19.015	61.355	0.64295	6.19627
E	10	108	109	108.5	19.025	61.365	0.66757	6.5418
E	10	109	110	109.5	19.035	61.375	0.65476	5.9138
E	10	110	111	110.5	19.045	61.385	0.63585	5.5457
E	10	111	112	111.5	19.055	61.395	0.62771	5.67515
E	10	112	113	112.5	19.065	61.405	0.63166	6.09456
E	10	113	114	113.5	19.075	61.415	0.63182	5.69256
E	10	114	115	114.5	19.085	61.425	0.66473	8.65212
E	10	115	116	115.5	19.095	61.435	0.66429	8.35341
E	10	116	117	116.5	19.105	61.445	0.62147	9.89129
E	10	117	118	117.5	19.115	61.455	0.67152	11.3869
E	10	118	119	118.5	19.125	61.465	0.73468	11.5297
E	10	119	120	119.5	19.135	61.475	0.76893	14.9813
E	10	120	121	120.5	19.145	61.485	0.70115	17.0319
E	10	121	122	121.5	19.155	61.495	0.65447	12.3628
E	10	122	123	122.5	19.165	61.505	0.55295	17.6334
E	10	123	124	123.5	19.175	61.515	0.52816	27.2269
E	10	124	125	124.5	19.185	61.525	0.44981	41.3759
E	10	125	126	125.5	19.195	61.535	0.51519	36.3255
E	10	126	127	126.5	19.205	61.545	0.46169	38.3073
E	10	127	128	127.5	19.215	61.555	0.42756	41.5729
E	10	128	129.5	128.75	19.2275	61.5675	0.42456	40.6091
E	10	129	130	129.5	19.235	61.575	0.43319	41.5901
E	10	130	131	130.5	19.245	61.585	0.43578	40.5065
E	10	131	132	131.5	19.255	61.595	0.42465	42.1819
E	10	132	133	132.5	19.265	61.605	0.42272	43.2142
E	10	133	134	133.5	19.275	61.615	0.41813	42.6435
E	10	134	135	134.5	19.285	61.625	0.40122	41.1584
E	10	135	136	135.5	19.295	61.635	0.41932	41.9955
E	10	136	137	136.5	19.305	61.645	0.42851	42.9894
E	10	137	138	137.5	19.315	61.655	0.43535	42.5151
E	10	138	139	138.5	19.325	61.665	0.43951	42.2372
E	10	139	140	139.5	19.335	61.675	0.44673	41.7722
E	10	140	141	140.5	19.345	61.685	0.42815	43.4522
E	10	143	144.5	143.75	19.3775	61.7175	0.50667	42.1817
E	10	146	147.5	146.75	19.4075	61.7475	0.44517	43.2504
E	10	149	150	149.5	19.435	61.775	0.44682	43.1784
E	11	1	2.5	1.75	19.5875	62.0775	0.4661	40.9653
E	11	10	11.5	10.75	19.6775	62.1675	0.42365	40.5075
E	11	20	21.5	20.75	19.7775	62.2675	0.41417	41.3995
E	11	30	31.5	30.75	19.8775	62.3675	0.47287	37.8668
E	11	40	41.5	40.75	19.9775	62.4675	0.42864	40.8208
E	11	50	52.5	51.25	20.0825	62.5725	0.43717	42.1517
E	11	60	61.5	60.75	20.1775	62.6675	0.41755	45.2873
E	11	70	71.5	70.75	20.2775	62.7675	0.40561	45.7324
E	11	80	81.5	80.75	20.3775	62.8675	0.41745	43.0415
E	11	90	91.5	90.75	20.4775	62.9675	0.41415	46.1428
E	11	98.5	100	99.25	20.5625	63.0525	0.38495	46.5226
E	12	20	21.5	20.75	20.8975	63.4975	0.40099	43.1128
E	12	40	41.5	40.75	21.0975	63.6975	0.33418	50.8432
E	12	60	61.5	60.75	21.2975	63.8975	0.4047	44.2465
E	12	76	78	77	21.46	64.06	0.43675	37.6703
E	12	100	101.5	100.75	21.6975	64.2975	0.43684	34.4351
E	12	120	121.5	120.75	21.8975	64.4975	0.45154	32.8174
E	12	140	141.5	140.75	22.0975	64.6975	0.43585	31.7344
E	13	10	11	10.5	22.335	65.085	0.44671	36.4087
E	13	30	31.5	30.75	22.5375	65.2875	0.46263	32.6225
E	13	50	51.5	50.75	22.7375	65.4875	0.43688	43.0596
E	13	69.5	71.5	70.5	22.935	65.685	0.40765	51.0175
E	13	90	91.5	90.75	23.1375	65.8875	0.44954	46.9042
E	13	110	111.5	110.75	23.3375	66.0875	0.4334	39.7424
E	13	130	131.5	130.75	23.5375	66.2875	0.47366	32.4632
E	13	148.5	150	149.25	23.7225	66.4725	0.49427	29.9424
E	14	25	26.5	25.75	24.1175	67.9475	0.50655	26.3657
E	14	50	52	51	24.37	68.2	0.57334	21.3036
E	14	75	77	76	24.62	68.45	0.57758	26.7386
E	14	100	101.5	100.75	24.8675	68.6975	0.64601	37.8165
E	14	125	126.5	125.75	25.1175	68.9475	0.61077	48.4492
E	14	150	151.5	150.75	25.3675	69.1975	0.65324	49.9447
E	15	15	16.5	15.75	25.5475	69.6975	0.63654	51.2217
E	15	39	40.5	39.75	25.7875	69.9375	0.66058	49.5179
E	15	64.5	67	65.75	26.0475	70.1975	0.62697	45.8719
E	15	90	91.5	90.75	26.2975	70.4475	0.69987	44.5982
E	15	115	116.5	115.75	26.5475	70.6975	0.74057	37.8751
E	15	137	139.5	138.25	26.7725	70.9225	0.83035	32.9922
E	16	10	12	11	26.95	71.15	0.4863	31.9089
E	16	30	31.5	30.75	27.1475	71.3475	0.54032	31.4831
E	16	50	52	51	27.35	71.55	0.73812	26.8616
E	16	70.5	72	71.25	27.5525	71.7525	0.76621	28.7626
E	16	87.5	90	88.75	27.7275	71.9275	0.7638	35.4783

## Sheet: TABLE A5
APPENDIX TABLE 5. BULK CARBONATE STABLE ISOTOPES (δ13C AND δ18O) FOR EL KEF HOLES A, C , D AND E
Hole	Core	Top interval	Bottom interval	Midpoint interval	Curated depth	Composite core depth	δ13C	δ18O	Contributing lab
		(cm)	(cm)	(cm)	(mbs)	(mcd)	(‰)	(‰)
A	1	69	70	69.5	0.695	0.695	-0.00694963	-2.79915	NOCS
A	2	40	41	40.5	1.905	1.905	-1.03293	-3.30995	NOCS
A	3	3	4	3.5	3.035	3.035	-1.57533	-3.0474	NOCS
A	4	38	39	38.5	4.885	4.885	-1.0244	-3.07147	NOCS
A	5	100	101	100.5	7.005	7.005	0.155695	-3.06615	NOCS
A	9	22	23	22.5	11.465	12.375	-1.03172	-2.80683	NOCS
A	10	24	25	24.5	12.785	13.765	-0.993393	-2.76716	NOCS
A	11	61	62	61.5	13.355	14.035	-0.372649	-2.58646	NOCS
A	12	46	47	46.5	14.455	15.085	-0.719945	-3.0178	NOCS
A	16	85	86	85.5	19.835	61.235	-0.091375	-2.9237	NOCS
A	16	86	87	86.5	19.845	61.245	-0.0843441	-2.94157	NOCS
A	16	87	88	87.5	19.855	61.255	0.178813	-3.17188	NOCS
A	16	88	89	88.5	19.865	61.265	-0.267703	-3.26943	NOCS
A	16	89	90	89.5	19.875	61.275	-0.0783176	-3.21655	NOCS
A	16	90	91	90.5	19.885	61.285	-0.0753044	-3.11728	NOCS
A	16	91	92	91.5	19.895	61.295	0.421882	-2.81251	NOCS
A	16	92	93	92.5	19.905	61.305	-0.139587	-3.12324	NOCS
A	16	93	94	93.5	19.915	61.315	-0.168715	-3.06466	NOCS
A	16	95	96	95.5	19.935	61.335	-0.113133	-3.06278	NOCS
A	16	96	97	96.5	19.945	61.345	-0.153567	-3.48251	NOCS
A	16	97	98	97.5	19.955	61.355	-0.188947	-3.21632	NOCS
A	16	98	99	98.5	19.965	61.365	-0.256673	-3.29807	NOCS
A	16	99	100	99.5	19.975	61.375	-0.152644	-3.16592	NOCS
A	16	100	101	100.5	19.985	61.385	-0.161684	-3.20464	NOCS
A	16	102	103	102.5	20.005	61.405	0.715759	-3.21333	NOCS
A	16	103	104	103.5	20.015	61.415	0.832006	-3.23925	NOCS
A	16	104	105	104.5	20.025	61.425	0.870418	-3.35889	NOCS
A	16	105	106	105.5	20.035	61.435	1.21107	-3.27315	NOCS
A	16	106	107	106.5	20.045	61.445	1.22972	-3.01836	NOCS
A	16	107	108	107.5	20.055	61.455	1.19995	-3.10366	NOCS
A	16	109	110	109.5	20.075	61.475	1.3627	-3.2542	NOCS
A	16	110	111	110.5	20.085	61.485	1.41223	-3.09668	NOCS
A	16	113	114	113.5	20.115	61.515	1.00914	-3.27429	NOCS
A	16	114	115	114.5	20.125	61.525	0.86155	-3.3041	NOCS
A	16	115	116	115.5	20.135	61.535	0.766815	-3.54658	NOCS
A	18	10	10.5	10.25	22.1825	63.4925	0.877173	-3.47542	NOCS
A	18	30	30.5	30.25	22.3825	63.6925	0.885219	-3.22201	NOCS
A	18	50	50.5	50.25	22.5825	63.8925	0.924427	-3.03928	NOCS
A	18	70	70.5	70.25	22.7825	64.0925	0.961663	-3.12561	NOCS
A	18	90	90.5	90.25	22.9825	64.2925	1.0371	-3.09878	NOCS
A	18	110	112	111	23.19	64.5	1.06526	-3.15344	NOCS
A	18	130	130.5	130.25	23.3825	64.6925	1.08438	-3.16834	NOCS
A	18	146	146.5	146.25	23.5425	64.8525	1.10751	-3.56487	NOCS
A	19	10	10.5	10.25	23.7825	65.1425	0.980774	-3.05307	NOCS
A	19	30	30.5	30.25	23.9825	65.3425	0.833922	-3.18921	NOCS
A	19	50	50.5	50.25	24.1825	65.5425	0.724285	-3.51219	NOCS
A	19	70	70.5	70.25	24.3825	65.7425	0.629736	-3.7189	NOCS
A	19	90	90.5	90.25	24.5825	65.9425	0.797711	-3.73778	NOCS
A	19	99.5	100.5	100	24.68	66.04	0.673993	-3.42872	NOCS
A	19	110	110.5	110.25	24.7825	66.1425	0.774285	-3.01438	NOCS
A	19	130	130.5	130.25	24.9825	66.3425	0.747868	-3.15503	NOCS
A	19	147	148.5	147.75	25.1575	66.5175	0.913404	-3.01689	NOCS
A	20	10	11	10.5	25.385	66.785	0.777288	-2.74338	NOCS
A	20	30	31	30.5	25.585	66.985	1.14974	-3.04969	NOCS
A	20	49.5	50	49.75	25.7775	67.1775	0.75784	-2.96323	NOCS
A	20	70	71	70.5	25.985	67.385	0.939535	-3.02126	NOCS
A	20	88	91	89.5	26.175	67.575	0.779606	-2.99642	NOCS
A	20	110	111	110.5	26.385	67.785	0.826881	-2.99841	NOCS
A	20	129	132	130.5	26.585	67.985	0.735349	-3.01828	NOCS
A	20	146.5	149	147.75	26.7575	68.1575	0.713221	-3.22002	NOCS
C	2	45	46	45.5	1.055	14.305	1.98667	-3.77192	Yale
C	2	105	106	105.5	1.655	14.905	1.73615	-3.39325	Yale
C	2	139	140	139.5	1.995	15.245	1.35432	-3.09316	Yale
C	3	25	26	25.5	2.355	15.555	1.85939	-3.15441	Yale
C	3	85	86	85.5	2.955	16.155	1.85535	-3.09725	Yale
C	3	145	146	145.5	3.555	16.755	2.6482	-3.1016	Yale
C	4	16	19	17.5	3.875	16.995	1.74974	-2.6193	Yale
C	4	65	66	65.5	4.355	17.475	2.7483	-3.52389	Yale
C	4	125	126	125.5	4.955	18.075	2.23617	-3.16461	Yale
C	5	45	46	45.5	5.755	18.865	2.00961	-2.82499	Yale
C	5	65	66	65.5	5.955	19.065	2.5092	-2.71151	Yale
C	5	105	106	105.5	6.355	19.465	2.05997	-3.32856	Yale
C	5	145	146	145.5	6.755	19.865	2.07105	-3.2161	Yale
C	6	5	6	5.5	6.955	19.905	1.91392	-2.34877	Yale
C	6	25	26	25.5	7.155	20.105	2.1345	-2.5504	Yale
C	6	45	46	45.5	7.355	20.305	1.89176	-2.4582	Yale
C	6	65	66	65.5	7.555	20.505	2.08213	-2.66996	Yale
C	6	105	106	105.5	7.955	20.905	1.78096	-2.96988	Yale
C	6	125	126	125.5	8.155	21.105	2.27048	-3.06107	Yale
C	6	145	146	145.5	8.355	21.305	2.18487	-3.09451	Yale
C	7	25	26	25.5	8.755	21.685	2.06702	-3.01142	Yale
C	7	45	46	45.5	8.955	21.885	2.31077	-3.12491	Yale
C	7	85	86	85.5	9.355	22.285	2.08918	-3.17962	Yale
C	7	105	106	105.5	9.555	22.485	1.99853	-2.82398	Yale
C	7	125	126	125.5	9.755	22.685	2.70964	-3.30931	Yale
C	7	145	146	145.5	9.955	22.885	1.97234	-2.91111	Yale
C	8	5	6	5.5	10.155	23.075	2.05191	-3.0094	Yale
C	8	33	36	34.5	10.445	23.365	2.19796	-3.35795	Yale
C	8	65	66	65.5	10.755	23.675	2.18869	-2.98293	Yale
C	8	105	106	105.5	11.155	24.075	2.18162	-3.14216	Yale
C	8	125	126	125.5	11.355	24.275	2.01697	-3.11868	Yale
C	8	145	146	145.5	11.555	24.475	2.09172	-3.23912	Yale
C	9	25	26	25.5	11.955	24.945	1.74773	-3.01548	Yale
C	9	45	46	45.5	12.155	25.145	1.90687	-3.31641	Yale
C	9	85	86	85.5	12.555	25.545	2.02874	-2.88882	Yale
C	9	105	106	105.5	12.755	25.745	2.17479	-3.25561	Yale
C	9	125	126	125.5	12.955	25.945	2.26343	-3.39645	Yale
C	9	145	146	145.5	13.155	26.145	1.89579	-3.00028	Yale
C	10	5	6	5.5	13.355	26.245	2.59179	-3.24649	Yale
C	10	25	26	25.5	13.555	26.445	1.89176	-3.11984	Yale
C	10	65	66	65.5	13.955	26.845	1.91394	-3.21565	Yale
C	10	105	106	105.5	14.355	27.245	1.91899	-3.03294	Yale
C	10	125	126	125.5	14.555	27.445	2.14055	-3.07627	Yale
C	10	145	146	145.5	14.755	27.645	1.97536	-3.02764	Yale
C	11	25	26	25.5	15.155	28.445	1.82707	-2.81554	Yale
C	11	45	46	45.5	15.355	28.645	1.70989	-2.51648	Yale
C	11	85	86	85.5	15.755	29.045	1.61797	-2.66958	Yale
C	11	125	126	125.5	16.155	29.445	1.7705	-2.7594	Yale
C	11	145	146	145.5	16.355	29.645	1.69171	-2.83187	Yale
C	12	5	6	5.5	16.555	29.695	1.81999	-2.81452	Yale
C	12	35	36	35.5	16.855	29.995	1.69878	-2.12862	Yale
C	12	65	66	65.5	17.155	30.295	1.41089	-2.63896	Yale
C	12	105	106	105.5	17.555	30.695	1.82808	-2.86963	Yale
C	12	125	126	125.5	17.755	30.895	2.07051	-2.4583	Yale
C	12	145	146	145.5	17.955	31.095	1.63716	-2.66754	Yale
C	13	5	6	5.5	18.155	31.605	2.0695	-3.15645	Yale
C	13	45	46	45.5	18.555	32.005	1.90283	-2.68387	Yale
C	13	75	76	75.5	18.855	32.305	2.40688	-2.89515	Yale
C	13	105	106	105.5	19.155	32.605	1.6907	-2.47463	Yale
C	13	125	126	125.5	19.355	32.805	1.82808	-2.55424	Yale
C	13	145	146	145.5	19.555	33.005	1.821	-2.55424	Yale
C	14	25	26	25.5	19.955	33.295	1.5513	-2.31438	Yale
C	14	55	56	55.5	20.255	33.595	1.79013	-2.43873	Yale
C	14	85	86	85.5	20.555	33.895	1.67757	-2.61038	Yale
C	14	105	106	105.5	20.755	34.095	1.76593	-2.53318	Yale
C	14	125	126	125.5	20.955	34.295	1.81333	-2.49053	Yale
C	14	145	146	145.5	21.155	34.495	1.57432	-2.586	Yale
C	15	5	6	5.5	21.355	34.685	1.60155	-2.63069	Yale
C	15	35	36	35.5	21.655	34.985	1.66342	-2.31948	Yale
C	15	65	66	65.5	21.955	35.285	1.71999	-2.89923	Yale
C	15	105	106	105.5	22.355	35.685	1.82404	-2.74103	Yale
C	15	125	126	125.5	22.555	35.885	1.66342	-2.75328	Yale
C	15	145	146	145.5	22.755	36.085	1.42705	-2.80125	Yale
C	16	25	26	25.5	23.155	36.525	1.84963	-3.06031	Yale
C	16	45	46	45.5	23.355	36.725	1.75786	-3.03898	Yale
C	16	65	66	65.5	23.555	36.925	1.71853	-2.90288	Yale
C	16	85	86	85.5	23.755	37.125	1.56222	-2.86022	Yale
C	16	105	106	105.5	23.955	37.325	1.56524	-2.68452	Yale
C	16	135	136	135.5	24.255	37.625	1.74475	-3.07757	Yale
C	17	25	26	25.5	24.655	38.075	1.34741	-2.42349	Yale
C	17	45	46	45.5	24.855	38.275	1.35346	-2.5149	Yale
C	17	85	86	85.5	25.255	38.675	1.39178	-3.16695	Yale
C	17	105	106	105.5	25.455	38.875	1.2985	-3.37517	Yale
C	17	125	126	125.5	25.655	39.075	1.30102	-3.29391	Yale
C	17	145	146	145.5	25.855	39.275	1.20118	-3.10804	Yale
C	18	25	26	25.5	26.255	39.855	1.37464	-3.01663	Yale
C	18	45	46	45.5	26.455	40.055	1.33833	-2.86226	Yale
C	18	85	86	85.5	26.855	40.455	1.59348	-3.33149	Yale
C	18	105	106	105.5	27.055	40.655	2.03519	-3.75907	Yale
C	18	125	126	125.5	27.255	40.855	1.41397	-3.11109	Yale
C	18	145	146	145.5	27.455	41.055	1.49868	-3.08976	Yale
C	19	25	26	25.5	27.855	41.455	1.24757	-2.60936	Yale
C	19	45	46	45.5	28.055	41.655	1.20925	-2.25896	Yale
C	19	85	86	85.5	28.455	42.055	1.50675	-2.95163	Yale
C	19	105	106	105.5	28.655	42.255	1.62777	-3.1314	Yale
C	19	125	126	125.5	28.855	42.455	1.31816	-2.7546	Yale
C	19	145	146	145.5	29.055	42.655	1.46137	-2.77897	Yale
C	20	25	26	25.5	29.455	43.055	1.11546	-2.73124	Yale
C	20	45	46	45.5	29.655	43.255	1.26471	-2.88866	Yale
C	20	85	86	85.5	30.055	43.655	0.998475	-2.74241	Yale
C	20	105	106	105.5	30.255	43.855	1.00856	-2.6053	Yale
C	20	125	126	125.5	30.455	44.055	1.03276	-2.55045	Yale
C	20	145	146	145.5	30.655	44.255	1.0731	-2.59412	Yale
C	21	25	26	25.5	31.055	44.655	1.05092	-2.72616	Yale
C	21	46	47	46.5	31.265	44.865	1.00989	-2.77325	Yale
C	21	85	86	85.5	31.655	45.255	1.11647	-3.01156	Yale
C	21	105	106	105.5	31.855	45.455	1.02268	-2.92421	Yale
C	21	125	126	125.5	32.055	45.655	1.01191	-3.04318	Yale
C	21	145	146	145.5	32.255	45.855	0.754875	-2.74463	Yale
C	22	25	26	25.5	32.655	46.255	0.810533	-2.39495	Yale
C	22	45	46	45.5	32.855	46.455	1.05745	-2.74667	Yale
C	22	85	86	85.5	33.255	46.855	0.804461	-2.40109	Yale
C	22	85	86	85.5	33.255	46.855	0.832795	-2.76507	Yale
C	22	105	106	105.5	33.455	47.055	0.796365	-2.77223	Yale
C	22	125	126	125.5	33.655	47.255	0.766007	-2.4655	Yale
C	22	145	146	145.5	33.855	47.455	1.03316	-2.74463	Yale
C	23	5	6	5.5	34.055	47.655	0.914764	-2.94911	Yale
C	23	15	16	15.5	34.155	47.755	1.01495	-2.87447	Yale
C	23	25	26	25.5	34.255	47.855	0.74172	-2.56161	Yale
C	23	35	36	35.5	34.355	47.955	0.718445	-2.71191	Yale
C	23	45	46	45.5	34.455	48.055	0.537305	-2.33667	Yale
C	23	55	56	55.5	34.555	48.155	-0.0830223	-1.6864	Yale
C	23	65	66	65.5	34.655	48.255	0.583855	-2.39086	Yale
C	23	75	77	76	34.76	48.36	0.728564	-2.36019	Yale
C	23	95	96	95.5	34.955	48.555	0.91274	-2.72009	Yale
C	23	103	103.5	103.25	35.0325	48.6325	0.929943	-2.85198	Yale
C	23	115	116	115.5	35.155	48.755	0.972445	-2.7661	Yale
C	23	125	126	125.5	35.255	48.855	0.698206	-2.74565	Yale
C	23	135	136	135.5	35.355	48.955	0.603504	-2.38727	Yale
C	23	145	146	145.5	35.455	49.055	0.589403	-2.60613	Yale
D	4	10	10	10	7.99	23.17	2.0205	-2.34	Yale
D	4	110	110	110	8.99	24.17	2.64367	-2.884	Yale
D	4	150	150	150	9.39	24.57	2.0815	-3.048	Yale
D	5	110	110	110	10.52	25.7	2.33633	-2.964	Yale
D	5	150	150	150	10.92	26.1	2.01067	-2.774	Yale
D	6	10	10	10	11.15	26.33	1.70667	-5.188	Yale
D	6	60	60	60	11.65	26.83	2.39167	-2.981	Yale
D	6	110	110	110	12.15	27.33	1.55367	-2.484	Yale
D	6	150	150	150	12.55	27.73	1.7445	-2.578	Yale
D	7	10	10	10	12.79	27.97	3.0375	-3.065	Yale
D	7	60	60	60	13.29	28.47	1.75767	-2.526	Yale
D	7	110	110	110	13.79	28.97	2.34967	-2.63	Yale
D	7	150	150	150	14.19	29.37	1.7935	-2.349	Yale
D	8	10	10	10	14.42	57.7	1.67867	-2.201	Yale
D	8	60	60	60	14.92	58.2	-0.904333	-2.594	Yale
D	8	110	110	110	15.42	58.7	-1.13967	-2.479	Yale
D	8	150	150	150	15.82	59.1	-1.06233	-2.592	Yale
D	9	10	10	10	16.05	59.27	-1.3395	-2.159	Yale
D	9	60	60	60	16.55	59.77	-1.15967	-2.726	Yale
D	9	110	110	110	17.05	60.27	-1.01333	-3.599	Yale
D	9	150	150	150	17.45	60.67	-1.76167	-2.564	Yale
D	10	10	10	10	17.68	60.84	-0.728333	-3.427	Yale
D	10	60	60	60	18.18	61.34	-0.0955	-3.567	Yale
D	10	110	110	110	18.68	61.84	1.17767	-3.241	Yale
D	10	150	150	150	19.08	62.24	1.0965	-2.936	Yale
D	11	10	10	10	19.31	62.47	0.894667	-2.541	Yale
D	11	10	10	10	19.31	62.47	0.96367	-2.876	Yale
D	11	60	60	60	19.81	62.97	1.01733	-2.998	Yale
D	11	110	110	110	20.31	63.47	0.993333	-3.156	Yale
D	12	8	8	8	20.92	64.04	0.920667	-3.262	Yale
D	12	60	60	60	21.44	64.56	1.08567	-3.119	Yale
D	12	110	110	110	21.94	65.06	1.08067	-3.148	Yale
D	12	150	150	150	22.34	65.46	0.7075	-3.162	Yale
D	13	10	10	10	22.57	66.19	0.62867	-3.151	Yale
D	13	60	60	60	23.07	66.69	0.921	-3.029	Yale
D	13	110	110	110	23.57	67.19	0.943667	-2.847	Yale
D	13	150	150	150	23.97	67.59	0.7705	-3.163	Yale
D	14	10	10	10	24.2	68.3	0.73767	-3.07	Yale
D	14	60	60	60	24.7	68.8	0.199333	-3.129	Yale
D	14	110	110	110	25.2	69.3	-0.3105	-3.29	Yale
D	15	10	10	10	25.4	69.78	-0.161333	-2.778	Yale
D	15	60	60	60	25.9	70.28	-0.162667	-3.35	Yale
D	16	10	10	10	26.71	71.27	-0.5775	-2.677	Yale
D	16	110	110	110	27.71	72.27	0.290667	-3.157	Yale
D	16	150	150	150	28.11	72.67	0.132667	-3.04	Yale
E	1	5	6	5.5	4.055	46.235	2.45786	-2.76032	NOCS
E	1	49	51	50	4.5	46.68	2.29873	-3.24851	NOCS
E	1	99	100	99.5	4.995	47.175	2.58633	-2.8788	NOCS
E	1	101	102	101.5	5.015	47.195	0.173528	-3.37195	NOCS
E	2	5	6	5.5	5.065	47.245	2.65057	-3.10081	NOCS
E	2	50	51	50.5	5.515	47.695	2.13869	-2.72249	NOCS
E	2	100	101	100.5	6.015	48.195	2.67566	-2.64881	NOCS
E	2	115	116	115.5	6.165	48.345	1.38043	-3.11504	NOCS
E	2	149	150	149.5	6.505	48.685	2.22902	-2.9694	NOCS
E	3	3	4	3.5	6.675	48.855	2.43678	-2.95347	NOCS
E	3	50	51	50.5	7.145	49.325	1.83658	-2.73543	NOCS
E	3	63	64	63.5	7.275	49.455	0.152592	-3.04825	NOCS
E	3	100	101	100.5	7.645	49.825	1.39095	-2.16794	NOCS
E	3	100	101	100.5	7.645	49.825	1.39095	-2.16794	NOCS
E	3	148	149	148.5	8.125	50.305	1.81928	-2.32693	NOCS
E	4	5	6	5.5	8.295	50.475	2.13367	-2.66773	NOCS
E	4	10	10	10	8.34	50.52	1.95533	-2.534	Yale
E	4	30	30	30	8.54	50.72	2.28367	-2.675	Yale
E	4	34	35	34.5	8.585	50.765	-1.02443	-3.10946	NOCS
E	4	50	50	50	8.74	50.92	2.78467	-3.205	Yale
E	4	50	51	50.5	8.745	50.925	1.99918	-2.5154	NOCS
E	4	70	70	70	8.94	51.12	1.8335	-2.292	Yale
E	4	100	101	100.5	9.245	51.425	1.38086	-3.55637	NOCS
E	4	110	110	110	9.34	51.52	1.34967	-3.085	Yale
E	4	130	130	130	9.54	51.72	1.23267	-3.15	Yale
E	4	150	150	150	9.74	51.92	1.46422	-3.06398	NOCS
E	5	5	6	5.5	9.925	52.105	0.756628	-3.03809	NOCS
E	5	7	8	7.5	9.945	52.125	-1.13481	-2.94768	NOCS
E	5	10	10	10	9.97	52.15	0.682333	-2.669	Yale
E	5	10	11	10.5	9.975	52.155	0.8309	-2.65578	NOCS
E	5	30	31	30.5	10.175	52.355	0.180517	-2.96541	NOCS
E	5	50	51	50.5	10.375	52.555	-0.0735189	-3.54939	NOCS
E	5	70	70	70	10.57	52.75	0.0986667	-2.631	Yale
E	5	70	72	71	10.58	52.76	0.217653	-2.4268	NOCS
E	5	90	91.5	90.75	10.7775	52.9575	0.241741	-2.55622	NOCS
E	5	100	100.5	100.25	10.8725	53.0525	0.206613	-2.59306	NOCS
E	5	110	110	110	10.97	53.15	0.0983333	-2.647	Yale
E	5	110	111.5	110.75	10.9775	53.1575	0.145388	-2.72249	NOCS
E	5	130	130	130	11.17	53.35	-0.09	-2.561	Yale
E	5	130	131.5	130.75	11.1775	53.3575	0.0470279	-2.73941	NOCS
E	5	148.5	150	149.25	11.3625	53.5425	0.410359	-2.9236	NOCS
E	5	150	150	150	11.37	53.55	-0.0533333	-2.867	Yale
E	6	2	4	3	11.5	53.68	0.410359	-3.14064	NOCS
E	6	10	10	10	11.57	53.75	-0.217333	-2.517	Yale
E	6	20	21	20.5	11.675	53.855	-0.0152001	-3.00026	NOCS
E	6	40	42	41	11.88	54.06	0.0646121	-2.81611	NOCS
E	6	50	50	50	11.97	54.15	-0.527333	-2.692	Yale
E	6	50	51	50.5	11.975	54.155	-0.281175	-2.80313	NOCS
E	6	60	62	61	12.08	54.26	0.0229396	-2.94849	NOCS
E	6	70	70	70	12.17	54.35	0.134667	-3.092	Yale
E	6	71	72	71.5	12.185	54.365	0.575932	-3.17716	NOCS
E	6	80	82	81	12.28	54.46	0.209624	-3.02415	NOCS
E	6	90	90	90	12.37	54.55	-0.1235	-2.585	Yale
E	6	100	101	100.5	12.475	54.655	-1.57793	-10.0959	NOCS
E	6	110	110	110	12.57	54.75	-0.3175	-2.817	Yale
E	6	120	121	120.5	12.675	54.855	-0.0904759	-2.6518	NOCS
E	6	120	121	120.5	12.675	54.855	-0.0904759	-2.6518	NOCS
E	6	130	130	130	12.77	54.95	0.120333	-3.165	Yale
E	6	140	141	140.5	12.875	55.055	0.67533	-3.28201	NOCS
E	6	150	150	150	12.97	55.15	-0.00833333	-2.956	Yale
E	7	5	7	6	13.17	55.35	0.0159139	-2.94451	NOCS
E	7	10	10	10	13.21	55.39	-1.17933	-5.275	Yale
E	7	11	12	11.5	13.225	55.405	-1.37387	-2.96219	NOCS
E	7	25	27	26	13.37	55.55	0.067615	-2.92571	NOCS
E	7	45	46	45.5	13.565	55.745	0.06756	-2.92339	NOCS
E	7	50	50	50	13.61	55.79	-0.0893333	-2.889	Yale
E	7	65	66	65.5	13.765	55.945	0.0464429	-2.99326	NOCS
E	7	85	86	85.5	13.965	56.145	-0.243163	-2.48821	NOCS
E	7	90	90	90	14.01	56.19	-0.342333	-2.92	Yale
E	7	105	106	105.5	14.165	56.345	-0.150592	-2.43154	NOCS
E	7	110	110	110	14.21	56.39	-0.379333	-2.843	Yale
E	7	125	126	125.5	14.365	56.545	-0.293442	-2.76668	NOCS
E	7	130	130	130	14.41	56.59	-0.7305	-2.699	Yale
E	7	146	147	146.5	14.575	56.755	-0.409083	-2.87747	NOCS
E	7	150	150	150	14.61	56.79	-0.744333	-2.782	Yale
E	8	1	1	1	14.75	56.93	-0.374894	-2.82258	NOCS
E	8	10	10	10	14.84	57.02	-0.261333	-2.839	Yale
E	8	10	10	10	14.84	57.02	-0.163723	-2.90941	NOCS
E	8	20	20	20	14.94	57.12	-0.314559	-3.00024	NOCS
E	8	30	30	30	15.04	57.22	-0.35076	-3.01222	NOCS
E	8	40	40	40	15.14	57.32	-0.274336	-2.89245	NOCS
E	8	50	50	50	15.24	57.42	-0.598333	-3.115	Yale
E	8	50	50	50	15.24	57.42	0.277726	-3.36855	NOCS
E	8	60	60	60	15.34	57.52	0.678951	-3.38851	NOCS
E	8	70	70	70	15.44	57.62	-0.304333	-2.994	Yale
E	8	70	70	70	15.44	57.62	0.605544	-3.34959	NOCS
E	8	80	80	80	15.54	57.72	0.136945	-3.09806	NOCS
E	8	90	90	90	15.64	57.82	-0.447333	-2.741	Yale
E	8	90	90	90	15.64	57.82	0.0182868	-2.97329	NOCS
E	8	100	100	100	15.74	57.92	1.59201	-3.61509	NOCS
E	8	109	109	109	15.83	58.01	0.0524764	-2.87348	NOCS
E	8	120	120	120	15.94	58.12	0.349122	-3.26574	NOCS
E	8	130	130	130	16.04	58.22	0.708113	-3.24179	NOCS
E	8	130	130	130	16.04	58.22	0.721667	-3.197	Yale
E	8	140	140	140	16.14	58.32	0.967551	-3.35358	NOCS
E	8	148	148	148	16.22	58.4	-0.276667	-3.067	Yale
E	9	2	2	2	16.36	58.69	-0.978377	-3.07814	NOCS
E	9	10	10	10	16.44	58.77	-1.05545	-3.02833	NOCS
E	9	20	20	20	16.54	58.87	-0.661483	-2.97729	NOCS
E	9	30	30	30	16.64	58.97	-1.28394	-2.80561	NOCS
E	9	40	40	40	16.74	59.07	-1.17533	-2.57405	NOCS
E	9	50	50	50	16.84	59.17	-1.10133	-2.71	Yale
E	9	50	50	50	16.84	59.17	-0.997346	-2.58403	NOCS
E	9	60	60	60	16.94	59.27	-0.490535	-2.83755	NOCS
E	9	70	70	70	17.04	59.37	-1.3425	-2.111	Yale
E	9	70	70	70	17.04	59.37	-1.22963	-2.34148	NOCS
E	9	75	75	75	17.09	59.42	-1.03455	-2.29956	NOCS
E	9	80	80	80	17.14	59.47	-0.379922	-2.79064	NOCS
E	9	85	85	85	17.19	59.52	-0.491541	-2.77167	NOCS
E	9	90	90	90	17.24	59.57	-1.13933	-2.499	Yale
E	9	90	90	90	17.24	59.57	0.464763	-3.38452	NOCS
E	9	95	95	95	17.29	59.62	-0.496569	-2.95333	NOCS
E	9	100	100	100	17.34	59.67	-0.827466	-2.76205	NOCS
E	9	105	105	105	17.39	59.72	0.438442	-3.50382	NOCS
E	9	110	110	110	17.44	59.77	-1.0609	-2.82569	NOCS
E	9	113	114	113.5	17.475	59.805	1.42886	-3.06353	NOCS
E	9	115	115	115	17.49	59.82	-0.19102	-3.2612	NOCS
E	9	120	120	120	17.54	59.87	-0.61698	-3.13194	NOCS
E	9	124.5	124.5	124.5	17.585	59.915	1.13075	-3.59132	NOCS
E	9	130	130	130	17.64	59.97	-0.658333	-2.883	Yale
E	9	130	130	130	17.64	59.97	0.649925	-3.63408	NOCS
E	9	135	135	135	17.69	60.02	-0.266835	-3.05836	NOCS
E	9	140	140	140	17.74	60.07	-0.131333	-3.093	Yale
E	9	140	140	140	17.74	60.07	0.536203	-3.4382	NOCS
E	9	145	145	145	17.79	60.12	-0.243891	-3.31987	NOCS
E	9	150	150	150	17.84	60.17	0.0424093	-3.14387	NOCS
E	10	4	5	4.5	17.985	60.325	-1.06404	-3.34175	NOCS
E	10	7	8	7.5	18.015	60.355	-1.10149	-3.24851	NOCS
E	10	10	10	10	18.04	60.38	-1.31933	-3.136	Yale
E	10	10	12	11	18.05	60.39	-1.37619	-3.73302	NOCS
E	10	14	15	14.5	18.085	60.425	-1.30268	-3.24054	NOCS
E	10	16.5	18	17.25	18.1125	60.4525	-1.26578	-3.31387	NOCS
E	10	20	22	21	18.15	60.49	-1.39777	-3.04925	NOCS
E	10	22	23	22.5	18.165	60.505	-1.33805	-3.18444	NOCS
E	10	24	25	24.5	18.185	60.525	-1.41679	-2.90478	NOCS
E	10	26	27	26.5	18.205	60.545	-1.86922	-2.65969	NOCS
E	10	27	28	27.5	18.215	60.555	-1.96331	-2.5222	NOCS
E	10	28	29	28.5	18.225	60.565	-0.974108	-3.66093	NOCS
E	10	30	30	30	18.24	60.58	-1.85433	-2.538	Yale
E	10	30	32	31	18.25	60.59	-1.65902	-2.76729	NOCS
E	10	32	33	32.5	18.265	60.605	-1.7461	-2.63877	NOCS
E	10	34	35	34.5	18.285	60.625	-1.78114	-2.52818	NOCS
E	10	36	37	36.5	18.305	60.645	-1.92728	-2.79021	NOCS
E	10	37	38	37.5	18.315	60.655	-1.79998	-2.80419	NOCS
E	10	38	39	38.5	18.325	60.665	-1.55997	-2.82151	NOCS
E	10	40	41	40.5	18.345	60.685	-1.55394	-2.88412	NOCS
E	10	42	43	42.5	18.365	60.705	-1.55796	-2.89505	NOCS
E	10	44	45	44.5	18.385	60.725	-1.5316	-2.95995	NOCS
E	10	46	47	46.5	18.405	60.745	-1.38394	-3.07801	NOCS
E	10	47	48	47.5	18.415	60.755	-1.34303	-2.95598	NOCS
E	10	48	49	48.5	18.425	60.765	-1.13652	-2.8553	NOCS
E	10	50	50	50	18.44	60.78	-1.36633	-3.094	Yale
E	10	50	51	50.5	18.445	60.785	-1.28417	-2.97979	NOCS
E	10	52	53	52.5	18.465	60.805	-1.17342	-3.13853	NOCS
E	10	54	55	54.5	18.485	60.825	-1.14149	-3.32504	NOCS
E	10	56	57	56.5	18.505	60.845	-1.17142	-3.15639	NOCS
E	10	57	58	57.5	18.515	60.855	-1.0088	-3.09091	NOCS
E	10	58	59	58.5	18.525	60.865	-0.94295	-3.00162	NOCS
E	10	60	62	61	18.55	60.89	-0.515931	-3.31115	NOCS
E	10	62	63	62.5	18.565	60.905	-0.874108	-2.93812	NOCS
E	10	64	65	64.5	18.585	60.925	-0.758374	-3.12761	NOCS
E	10	65	66	65.5	18.595	60.935	-0.677854	-3.12263	NOCS
E	10	66	67	66.5	18.605	60.945	-0.705011	-3.12959	NOCS
E	10	67	68	67.5	18.615	60.955	-0.733175	-3.21008	NOCS
E	10	68	69	68.5	18.625	60.965	-0.84717	-3.21294	NOCS
E	10	70	70	70	18.64	60.98	-0.6595	-2.985	Yale
E	10	70	72	71	18.65	60.99	-0.583305	-2.89207	NOCS
E	10	71	72	71.5	18.655	60.995	-0.717468	-3.06114	NOCS
E	10	72	72	72	18.66	61	-0.680967	-2.91476	NOCS
E	10	73	73	73	18.67	61.01	-0.741853	-2.7102	NOCS
E	10	73.5	74	73.75	18.6775	61.0175	-0.567211	-2.70723	NOCS
E	10	74	74	74	18.68	61.02	-0.503319	-2.4317	NOCS
E	10	75	75	75	18.69	61.03	-0.587219	-2.4975	NOCS
E	10	76	76	76	18.7	61.04	-0.318385	-2.69605	NOCS
E	10	77	77	77	18.71	61.05	-0.541731	-2.55433	NOCS
E	10	78	78	78	18.72	61.06	-0.494979	-2.65339	NOCS
E	10	79	79	79	18.73	61.07	1.12679	-3.92667	NOCS
E	10	80	80	80	18.74	61.08	0.0557546	-3.14845	NOCS
E	10	81	81	81	18.75	61.09	-0.486998	-3.0036	NOCS
E	10	82	82	82	18.76	61.1	-0.669578	-2.7903	NOCS
E	10	83	83	83	18.77	61.11	-0.536677	-2.44865	NOCS
E	10	84	85	84.5	18.785	61.125	-0.544338	-2.50019	NOCS
E	10	85	86	85.5	18.795	61.135	-0.452634	-2.48526	NOCS
E	10	86	87	86.5	18.805	61.145	-0.388139	-2.50517	NOCS
E	10	87	88	87.5	18.815	61.155	-0.293064	-2.48753	NOCS
E	10	88	89	88.5	18.825	61.165	-0.443679	-2.8265	NOCS
E	10	89	90	89.5	18.835	61.175	-0.515449	-2.61215	NOCS
E	10	90	90	90	18.84	61.18	-0.385333	-2.73	Yale
E	10	90	91	90.5	18.845	61.185	-0.188947	-2.90227	NOCS
E	10	91	92	91.5	18.855	61.195	-0.392126	-2.65303	NOCS
E	10	92	93	92.5	18.865	61.205	-0.45682	-2.64704	NOCS
E	10	93	94	93.5	18.875	61.215	-0.0383308	-3.30704	NOCS
E	10	94	95	94.5	18.885	61.225	-0.462005	-2.63382	NOCS
E	10	95	96	95.5	18.895	61.235	0.207304	-3.62807	NOCS
E	10	96	97	96.5	18.905	61.245	-0.359779	-3.19438	NOCS
E	10	97	98	97.5	18.915	61.255	-0.294074	-2.94913	NOCS
E	10	98	99	98.5	18.925	61.265	-0.175746	-3.13515	NOCS
E	10	99	100	99.5	18.935	61.275	-0.196839	-2.87902	NOCS
E	10	100	101	100.5	18.945	61.285	-0.242037	-3.18379	NOCS
E	10	101	102	101.5	18.955	61.295	-0.290249	-3.24236	NOCS
E	10	102	103	102.5	18.965	61.305	0.0361858	-3.16592	NOCS
E	10	103	104	103.5	18.975	61.315	-0.143605	-3.21159	NOCS
E	10	104	105	104.5	18.985	61.325	-0.0210659	-3.0865	NOCS
E	10	105	106	105.5	18.995	61.335	-0.0170482	-3.19372	NOCS
E	10	106	107	106.5	19.005	61.345	0.252792	-3.48351	NOCS
E	10	107	108	107.5	19.015	61.355	-0.0868513	-3.30505	NOCS
E	10	108	109	108.5	19.025	61.365	0.0643095	-3.09544	NOCS
E	10	109	110	109.5	19.035	61.375	0.0120798	-3.15302	NOCS
E	10	110	110	110	19.04	61.38	0.162742	-2.87605	NOCS
E	10	110	110	110	19.04	61.38	0.1935	-2.655	Yale
E	10	110.5	110.5	110.5	19.045	61.385	0.206937	-3.05672	NOCS
E	10	111	111	111	19.05	61.39	-0.120503	-3.13515	NOCS
E	10	111.5	111.5	111.5	19.055	61.395	-0.231993	-3.23045	NOCS
E	10	112	112	112	19.06	61.4	-0.0813309	-3.21655	NOCS
E	10	112.5	112.5	112.5	19.065	61.405	-0.0542116	-3.10239	NOCS
E	10	113.5	113.5	113.5	19.075	61.415	0.0171019	-3.29398	NOCS
E	10	114	114	114	19.08	61.42	0.0793757	-3.36745	NOCS
E	10	114.5	114.5	114.5	19.085	61.425	0.0693315	-3.03885	NOCS
E	10	115.5	115.5	115.5	19.095	61.435	0.136627	-3.14508	NOCS
E	10	116	116	116	19.1	61.44	0.0202982	-2.97605	NOCS
E	10	116.5	116.5	116.5	19.105	61.445	0.403408	-3.22031	NOCS
E	10	117	117	117	19.11	61.45	0.52572	-3.20834	NOCS
E	10	117.5	117.5	117.5	19.115	61.455	0.490341	-3.21333	NOCS
E	10	118	118	118	19.12	61.46	0.457994	-3.41771	NOCS
E	10	119	119	119	19.13	61.47	0.6075	-3.09439	NOCS
E	10	119.5	119.5	119.5	19.135	61.475	0.560136	-3.39299	NOCS
E	10	120	120	120	19.14	61.48	0.904781	-3.24568	NOCS
E	10	120.5	120.5	120.5	19.145	61.485	0.843309	-3.25564	NOCS
E	10	121	121	121	19.15	61.49	1.07005	-3.08046	NOCS
E	10	121.5	121.5	121.5	19.155	61.495	1.32601	-3.34223	NOCS
E	10	122	122	122	19.16	61.5	1.30586	-3.18397	NOCS
E	10	122.5	122.5	122.5	19.165	61.505	1.47919	-3.02472	NOCS
E	10	123	123	123	19.17	61.51	1.36431	-3.13918	NOCS
E	10	123.5	123.5	123.5	19.175	61.515	1.45399	-3.14914	NOCS
E	10	124	124	124	19.18	61.52	1.45693	-3.15784	NOCS
E	10	124.5	124.5	124.5	19.185	61.525	1.25446	-3.10435	NOCS
E	10	125	125	125	19.19	61.53	1.37136	-2.84357	NOCS
E	10	125.5	125.5	125.5	19.195	61.535	1.30989	-3.01576	NOCS
E	10	126	126	126	19.2	61.54	1.29377	-3.10335	NOCS
E	10	126.5	126.5	126.5	19.205	61.545	1.27159	-3.10833	NOCS
E	10	127	127	127	19.21	61.55	1.26253	-3.18497	NOCS
E	10	127.5	127.5	127.5	19.215	61.555	1.28973	-3.16009	NOCS
E	10	128	128	128	19.22	61.56	1.325	-3.24469	NOCS
E	10	128.5	128.5	128.5	19.225	61.565	1.17888	-3.06951	NOCS
E	10	129	129	129	19.23	61.57	1.21012	-3.07847	NOCS
E	10	129.5	129.5	129.5	19.235	61.575	1.26675	-3.04526	NOCS
E	10	130	130	130	19.24	61.58	1.15167	-3.13321	NOCS
E	10	130	130	130	19.24	61.58	1.2295	-3.025	Yale
E	10	135	136	135.5	19.295	61.635	1.18392	-3.12027	NOCS
E	10	140	141	140.5	19.345	61.685	1.04788	-3.42285	NOCS
E	10	149	150	149.5	19.435	61.775	1.11338	-3.15511	NOCS
E	10	150	150	150	19.44	61.78	1.10267	-3.158	Yale
E	11	1	1	1	19.58	62.07	1.19501	-3.4965	NOCS
E	11	10	10	10	19.67	62.16	1.16567	-3.019	Yale
E	11	10	10	10	19.67	62.16	1.17366	-3.03928	NOCS
E	11	20	20	20	19.77	62.26	1.06199	-3.06454	NOCS
E	11	30	30	30	19.87	62.36	0.942067	-3.179	NOCS
E	11	40	40	40	19.97	62.46	1.27059	-3.34721	NOCS
E	11	50	50	50	20.07	62.56	1.14059	-4.2211	NOCS
E	11	60	50	60	20.17	62.66	-0.14133	-3.37	Yale
E	11	60	60	60	20.17	62.66	0.859433	-3.39797	NOCS
E	11	60	60	60	20.17	62.66	0.883667	-2.976	Yale
E	11	70	70	70	20.27	62.76	0.835738	-2.97588	NOCS
E	11	80	80	80	20.37	62.86	0.914821	-3.08662	NOCS
E	11	90	90	90	20.47	62.96	0.878384	-3.07216	NOCS
E	11	95	96	95.5	20.525	63.015	-0.0341776	-2.9834	NOCS
E	11	98.5	98.5	98.5	20.555	63.045	0.955376	-3.20535	NOCS
E	11	100	100	100	20.57	63.06	0.840667	-2.539	Yale
E	12	10	10	10	20.79	63.39	0.97567	-2.539	Yale
E	12	15	17	16	20.85	63.45	1.48757	-3.89385	NOCS
E	12	20	20	20	20.89	63.49	0.780988	-3.28516	NOCS
E	12	40	40	40	21.09	63.69	0.711029	-3.23129	NOCS
E	12	60	60	60	21.29	63.89	0.852667	-3.173	Yale
E	12	60	60	60	21.29	63.89	0.951321	-3.26421	NOCS
E	12	76	76	76	21.45	64.05	0.896571	-3.17841	NOCS
E	12	80	81	80.5	21.495	64.095	0.975654	-3.10757	NOCS
E	12	100	100	100	21.69	64.29	0.918876	-3.19038	NOCS
E	12	110	110	110	21.79	64.39	0.988667	-2.972	Yale
E	12	120	120	120	21.89	64.49	0.916849	-2.98885	NOCS
E	12	140	140	140	22.09	64.69	0.968557	-3.08163	NOCS
E	12	150	150	150	22.19	64.79	1.04367	-3.212	Yale
E	13	10	10	10	22.33	65.08	0.958418	-3.32707	NOCS
E	13	10	10	10	22.33	65.08	1.09367	-2.594	Yale
E	13	30	30	30	22.53	65.28	0.825599	-3.15247	NOCS
E	13	50	50	50	22.73	65.48	0.714071	-3.82192	NOCS
E	13	60	60	60	22.83	65.58	0.568667	-3.49	Yale
E	13	69.5	70	69.75	22.9275	65.6775	0.911779	-3.75807	NOCS
E	13	90	91.5	90.75	23.1375	65.8875	0.585307	-3.18539	NOCS
E	13	110	110	110	23.33	66.08	0.7525	-3.232	Yale
E	13	110	110	110	23.33	66.08	1.72318	-0.0503784	NOCS
E	13	130	130	130	23.53	66.28	0.753613	-2.95892	NOCS
E	13	150	150	150	23.73	66.48	0.782002	-2.99483	NOCS
E	13	150	150	150	23.73	66.48	0.953667	-3.09	Yale
E	14	10	10	10	23.96	67.79	0.832667	-3.14	Yale
E	14	25	25.5	25.25	24.1125	67.9425	0	0	NOCS
E	14	50	50.5	50.25	24.3625	68.1925	0.602543	-2.98984	NOCS
E	14	75	75.5	75.25	24.6125	68.4425	0.543738	-3.64234	NOCS
E	14	100	100.5	100.25	24.8625	68.6925	0.0874886	-2.92898	NOCS
E	14	110	110	110	24.96	68.79	0.139667	-3.357	Yale
E	14	125	125.5	125.25	25.1125	68.9425	0.148322	-3.46774	NOCS
E	14	150	150	150	25.36	69.19	-0.129667	-3.243	Yale
E	14	150	150.5	150.25	25.3625	69.1925	-0.458997	-2.99683	NOCS
E	15	10	10	10	25.49	69.64	0.087667	-3.452	Yale
E	15	15	15.5	15.25	25.5425	69.6925	-0.181192	-3.23927	NOCS
E	15	40	40.5	40.25	25.7925	69.9425	-0.203497	-3.28716	NOCS
E	15	60	60	60	25.99	70.14	-0.299333	-3.104	Yale
E	15	65	65.5	65.25	26.0425	70.1925	-0.213636	-3.43482	NOCS
E	15	90	91.5	90.75	26.2975	70.4475	0.174717	-3.42087	NOCS
E	15	110	110	110	26.49	70.64	-0.049333	-3.705	Yale
E	15	115	115.5	115.25	26.5425	70.6925	0.00941925	-3.41087	NOCS
E	15	137	137.5	137.25	26.7625	70.9125	-0.0230252	-2.88509	NOCS
E	15	140	140	140	26.79	70.94	-0.15433	-3.253	Yale
E	16	10	10.5	10.25	26.9425	71.1425	0.235516	-3.05669	NOCS
E	16	30	30.5	30.25	27.1425	71.3425	0.216252	-3.41586	NOCS
E	16	50	50.5	50.25	27.3425	71.5425	0.30953	-2.85017	NOCS
E	16	70.5	71	70.75	27.5475	71.7475	0.232475	-3.50865	NOCS
E	16	88.5	90	89.25	27.7325	71.9325	0.0773497	-3.11057	NOCS
E	16	90	90	90	27.74	71.94	0.27467	-3.182	Yale

## Sheet: TABLE A6
APPENDIX TABLE 6. BULK ORGANIC δ13C STABLE ISOTOPES FOR EL KEF HOLES A, B , C AND E
Hole	Core	Top interval	Bottom interval	Midpoint interval	Curated depth	Composite core depth	δ13C
		(cm)	(cm)	(cm)	(mbs)	(mcd)	(‰)
A	3	1	2	1.5	3.015	3.015	-26.6463
A	3	21	22	21.5	3.215	3.215	-26.1841
A	3	34	35	34.5	3.345	3.345	-26.7448
A	3	41	42	41.5	3.415	3.415	-26.2287
A	3	51	52	51.5	3.515	3.515	-26.2903
A	3	65	66	65.5	3.655	3.655	-26.4427
A	3	71	72	71.5	3.715	3.715	-26.4037
A	3	78	79	78.5	3.785	3.785	-26.9014
A	3	92	93	92.5	3.925	3.925	-26.4507
A	4	1	2	1.5	4.515	4.515	-26.8187
A	4	19	20	19.5	4.695	4.695	-27.096
A	4	34	35	34.5	4.845	4.845	-27.0583
A	4	48	49	48.5	4.985	4.985	-26.9365
A	4	61	62	61.5	5.115	5.115	-27.1379
A	4	71	72	71.5	5.215	5.215	-27.4083
A	4	81	82	81.5	5.315	5.315	-27.325
A	4	107	108	107.5	5.575	5.575	-27.6204
A	4	124	125	124.5	5.745	5.745	-26.8613
A	4	133	136	134.5	5.845	5.845	-27.1114
A	4	146	150	148	5.98	5.98	-27.2683
A	5	1	2	1.5	6.015	6.015	-26.8748
A	5	11	12	11.5	6.115	6.115	-26.7743
A	5	34	35	34.5	6.345	6.345	-27.0188
A	5	51	52	51.5	6.515	6.515	-26.9749
A	5	78	79	78.5	6.785	6.785	-26.6684
A	5	98	99	98.5	6.985	6.985	-26.727
A	5	118	119	118.5	7.185	7.185	-26.5333
A	5	138	139	138.5	7.385	7.385	-26.4738
A	6	1	2	1.5	7.515	7.515	-27.3904
A	6	4	5	4.5	7.545	7.545	-27.5936
A	6	24	25	24.5	7.745	7.745	-27.51
A	6	44	45	44.5	7.945	7.945	-27.3795
A	6	64	65	64.5	8.145	8.145	-27.608
A	6	84	85	84.5	8.345	8.345	-27.6536
A	6	111	112	111.5	8.615	8.615	-27.3291
A	7	7	8	7.5	8.775	8.795	-27.2761
A	7	21	22	21.5	8.915	8.935	-27.4705
A	7	42	43	42.5	9.125	9.145	-27.5112
A	7	61	62	61.5	9.315	9.335	-27.5629
A	7	81	82	81.5	9.515	9.535	-27.7859
A	7	98	99	98.5	9.685	9.705	-27.6545
A	8	4	5	4.5	9.785	10.415	-27.5979
A	8	29	30	29.5	10.035	10.665	-27.3652
A	8	41	42	41.5	10.155	10.785	-27.429
A	8	56	57	56.5	10.305	10.935	-27.1246
A	8	81	82	81.5	10.555	11.185	-27.3103
A	8	101	102	101.5	10.755	11.385	-27.6775
A	8	121	122	121.5	10.955	11.585	-27.7096
A	8	147	148	147.5	11.215	11.845	-27.9407
A	9	2	3	2.5	11.265	12.175	-27.6827
A	9	21	22	21.5	11.455	12.365	-27.8783
A	9	41	42	41.5	11.655	12.565	-27.8924
A	9	61	62	61.5	11.855	12.765	-27.8558
A	9	81	82	81.5	12.055	12.965	-27.6977
A	9	101	102	101.5	12.255	13.165	-27.7842
A	9	111	112	111.5	12.355	13.265	-27.5246
A	10	0	1	0.5	12.545	13.525	-27.3511
A	11	4	5	4.5	12.785	13.465	-27.6981
A	11	24	25	24.5	12.985	13.665	-27.6816
A	11	44	45	44.5	13.185	13.865	-27.7768
A	11	67	68	67.5	13.415	14.095	-27.7573
A	11	77	78	77.5	13.515	14.195	-27.7419
A	12	2	3	2.5	14.015	14.645	-27.8202
A	12	21	22	21.5	14.205	14.835	-28.0249
A	12	41	42	41.5	14.405	15.035	-27.8245
A	12	61	62	61.5	14.605	15.235	-27.393
A	12	81	82	81.5	14.805	15.435	-27.4781
A	12	101	102	101.5	15.005	15.635	-27.6204
A	12	121	122	121.5	15.205	15.835	-27.3413
A	13	1	2	1.5	15.405	56.885	-27.1956
A	13	21	22	21.5	15.605	57.085	-27.2602
A	13	41	42	41.5	15.805	57.285	-27.1723
A	13	61	62	61.5	16.005	57.485	-27.6539
A	13	81	82	81.5	16.205	57.685	-27.2339
A	13	101	102	101.5	16.405	57.885	-27.5099
A	13	118	119	118.5	16.575	58.055	-27.0835
A	14	38	42	40	17.15	58.63	-26.5169
A	14	49	53	51	17.26	58.74	-26.2634
A	14	62	66	64	17.39	58.87	-26.5419
A	14	72	77	74.5	17.495	58.975	-26.751
A	14	83	85	84	17.59	59.07	-26.4282
A	15	1	3	2	17.7	59.18	-26.4008
A	15	8	12	10	17.78	59.26	-26.4399
A	15	15	19	17	17.85	59.33	-26.3968
A	15	20	23	21.5	17.895	59.375	-26.4306
A	15	25	28	26.5	17.945	59.425	-26.3475
A	15	29	30	29.5	17.975	59.455	-26.44
A	15	35	36	35.5	18.035	59.515	-26.4121
A	15	41	42	41.5	18.095	59.575	-26.6686
A	15	45	46	45.5	18.135	59.615	-26.5052
A	15	50	51	50.5	18.185	59.665	-26.4795
A	15	55	56	55.5	18.235	59.715	-26.4709
A	15	60	61	60.5	18.285	59.765	-26.4371
A	15	65	66	65.5	18.335	59.815	-26.6086
A	15	70	71	70.5	18.385	59.865	-26.5626
A	15	74	75	74.5	18.425	59.905	-26.4931
A	15	78	79	78.5	18.465	59.945	-26.5923
A	15	83	84	83.5	18.515	59.995	-26.6273
A	15	88	89	88.5	18.565	60.045	-26.7396
A	15	94	95	94.5	18.625	60.105	-26.7197
A	15	98	99	98.5	18.665	60.145	-26.6067
A	15	102	103	102.5	18.705	60.185	-26.6999
A	15	110	111	110.5	18.785	60.265	-26.6042
A	15	116	117	116.5	18.845	60.325	-26.7381
A	16	0	1	0.5	18.985	60.385	-26.6751
A	16	2	3	2.5	19.005	60.405	-26.7839
A	16	4	5	4.5	19.025	60.425	-26.6828
A	16	6	7	6.5	19.045	60.445	-26.657
A	16	8	9	8.5	19.065	60.465	-26.3975
A	16	10	11	10.5	19.085	60.485	-26.6629
A	16	12	13	12.5	19.105	60.505	-26.6113
A	16	14	15	14.5	19.125	60.525	-26.8705
A	16	21	22	21.5	19.195	60.595	-26.7235
A	16	23	24	23.5	19.215	60.615	-26.8433
A	16	28	29	28.5	19.265	60.665	-26.7618
A	16	30	31	30.5	19.285	60.685	-26.9527
A	16	33	34	33.5	19.315	60.715	-26.8705
A	16	37	38	37.5	19.355	60.755	-26.8283
A	16	41	42	41.5	19.395	60.795	-26.9339
A	16	43	44	43.5	19.415	60.815	-27.066
A	16	45	46	45.5	19.435	60.835	-26.9676
A	16	55	56	55.5	19.535	60.935	-26.805
A	16	60	61	60.5	19.585	60.985	-26.8034
A	16	62	63	62.5	19.605	61.005	-26.754
A	16	66	67	66.5	19.645	61.045	-26.6291
A	16	68	69	68.5	19.665	61.065	-26.1215
A	16	70	71	70.5	19.685	61.085	-26.4625
A	16	72	73	72.5	19.705	61.105	-26.4832
A	16	74	75	74.5	19.725	61.125	-26.5658
A	16	76	77	76.5	19.745	61.145	-26.5555
A	16	78	79	78.5	19.765	61.165	-26.5452
A	16	80	81	80.5	19.785	61.185	-26.4832
A	16	82	83	82.5	19.805	61.205	-27.0338
A	16	84	85	84.5	19.825	61.225	-26.9925
A	16	85	86	85.5	19.835	61.235	-25.8739
A	16	86	87	86.5	19.845	61.245	-25.653
A	16	87	88	87.5	19.855	61.255	-25.6693
A	16	88	89	88.5	19.865	61.265	-25.7992
A	16	89	90	89.5	19.875	61.275	-25.6771
A	16	90	91	90.5	19.885	61.285	-25.6743
A	16	91	92	91.5	19.895	61.295	-26.5372
A	16	92	93	92.5	19.905	61.305	-25.8507
A	16	93	94	93.5	19.915	61.315	-25.9137
A	16	94	95	94.5	19.925	61.325	-26.0108
A	16	95	96	95.5	19.935	61.335	-26.0754
A	16	96	97	96.5	19.945	61.345	-26.2033
A	16	97	98	97.5	19.955	61.355	-25.8965
A	16	98	99	98.5	19.965	61.365	-26.0062
A	16	99	100	99.5	19.975	61.375	-26.1152
A	16	100	101	100.5	19.985	61.385	-27.0982
A	16	101	102	101.5	19.995	61.395	-26.9679
A	16	102	103	102.5	20.005	61.405	-27.0572
A	16	103	104	103.5	20.015	61.415	-26.7078
A	16	104	105	104.5	20.025	61.425	-26.5931
A	16	105	106	105.5	20.035	61.435	-27.3026
A	16	106	107	106.5	20.045	61.445	-26.702
A	16	107	108	107.5	20.055	61.455	-26.6594
A	16	108	109	108.5	20.065	61.465	-26.6867
A	16	109	110	109.5	20.075	61.475	-26.6679
A	16	110	111	110.5	20.085	61.485	-26.6413
A	16	113	114	113.5	20.115	61.515	-26.7769
A	16	114	115	114.5	20.125	61.525	-26.3651
A	16	115	116	115.5	20.135	61.535	-26.3315
A	16	116	117	116.5	20.145	61.545	-26.8377
A	16	117	118	117.5	20.155	61.555	-26.9202
A	16	118	119	118.5	20.165	61.565	-26.848
A	16	119	120	119.5	20.175	61.575	-26.8893
A	16	120	121	120.5	20.185	61.585	-26.9306
A	16	121	122	121.5	20.195	61.595	-26.817
A	16	122	123	122.5	20.205	61.605	-26.8686
A	16	123	124	123.5	20.215	61.615	-26.7551
A	16	126	127	126.5	20.245	61.645	-26.6931
A	16	127	128	127.5	20.255	61.655	-26.9202
A	16	129	130	129.5	20.275	61.675	-27.1783
A	16	130	131	130.5	20.285	61.685	-26.8686
A	16	131	132	131.5	20.295	61.695	-26.8377
A	16	132	133	132.5	20.305	61.705	-26.9202
A	16	133	134	133.5	20.315	61.715	-26.7757
A	16	135	136	135.5	20.335	61.735	-26.8686
A	16	136	137	136.5	20.345	61.745	-26.9719
A	16	137	138	137.5	20.355	61.755	-26.7964
A	16	138	139	138.5	20.365	61.765	-26.7654
A	16	139	140	139.5	20.375	61.775	-26.8996
A	16	140	141	140.5	20.385	61.785	-26.8583
A	16	141	142	141.5	20.395	61.795	-26.7757
A	16	143	144	143.5	20.415	61.815	-27.0028
A	16	144	145	144.5	20.425	61.825	-26.8273
A	16	145	146	145.5	20.435	61.835	-27.0441
A	16	146	147	146.5	20.445	61.845	-25.7949
A	16	147	148	147.5	20.455	61.855	-27.1577
A	16	148	149	148.5	20.465	61.865	-26.8686
A	16	149	150	149.5	20.475	61.875	-27.4055
A	16	150	151	150.5	20.485	61.885	-27.0132
A	17	1	4	2.5	20.605	61.985	-27.1061
A	17	6	9	7.5	20.655	62.035	-26.7757
A	17	11	14	12.5	20.705	62.085	-26.8789
A	17	16	19	17.5	20.755	62.135	-27.2506
A	17	21	24	22.5	20.805	62.185	-26.848
A	17	26	29	27.5	20.855	62.235	-26.8789
A	17	31	34	32.5	20.905	62.285	-27.199
A	17	39.5	42.5	41	20.99	62.37	-27.0854
A	17	49	52	50.5	21.085	62.465	-27.4777
A	17	61.5	64.5	63	21.21	62.59	-27.137
A	17	73	76	74.5	21.325	62.705	-26.9099
A	17	80.5	83.5	82	21.4	62.78	-27.1164
A	17	89	92	90.5	21.485	62.865	-27.0751
A	17	96	99	97.5	21.555	62.935	-27.3022
A	17	105	108	106.5	21.645	63.025	-27.199
A	17	115	118	116.5	21.745	63.125	-26.8686
A	17	124	125	124.5	21.825	63.205	-26.9512
A	17	136.5	138	137.25	21.9525	63.3325	-27.137
A	17	143.5	145.5	144.5	22.025	63.405	-27.2403
A	18	10	10.5	10.25	22.1825	63.4925	-26.1097
A	18	30	30.5	30.25	22.3825	63.6925	-26.2625
A	18	50	50.5	50.25	22.5825	63.8925	-26.3815
A	18	70	70.5	70.25	22.7825	64.0925	-25.9411
A	18	90	90.5	90.25	22.9825	64.2925	-26.1109
A	18	110	112	111	23.19	64.5	-26.0435
A	18	130	130.5	130.25	23.3825	64.6925	-25.9282
A	18	146	146.5	146.25	23.5425	64.8525	-26.0218
A	19	10	10.5	10.25	23.7825	65.1425	-26.2369
A	19	30	30.5	30.25	23.9825	65.3425	-26.5731
A	19	50	50.5	50.25	24.1825	65.5425	-26.6072
A	19	70	70.5	70.25	24.3825	65.7425	-26.6478
A	19	90	90.5	90.25	24.5825	65.9425	-26.6691
A	19	99.5	100.5	100	24.68	66.04	-26.6033
A	19	110	110.5	110.25	24.7825	66.1425	-26.5747
A	19	130	130.5	130.25	24.9825	66.3425	-26.585
A	19	147	148.5	147.75	25.1575	66.5175	-26.3466
A	20	10	11	10.5	25.385	66.785	-26.4513
A	20	30	31	30.5	25.585	66.985	-26.2815
A	20	49.5	50	49.75	25.7775	67.1775	-26.2707
A	20	70	71	70.5	25.985	67.385	-26.478
A	20	88	91	89.5	26.175	67.575	-26.2675
A	20	110	111	110.5	26.385	67.785	-26.2044
A	20	129	132	130.5	26.585	67.985	-26.2883
A	20	146.5	149	147.75	26.7575	68.1575	-26.2433
A	21	9	10	9.5	26.975	68.375	-27.0441
A	21	68	69	68.5	27.565	68.965	-27.4777
A	21	130	131	130.5	28.185	69.585	-27.6223
A	22	55	56	55.5	28.875	70.395	-27.0235
A	22	103	104	103.5	29.355	70.875	-27.1061
A	22	139	140	139.5	29.715	71.235	-27.0235
A	23	50	51	50.5	30.425	71.945	-27.2196
A	23	108	109	108.5	31.005	72.525	-26.8996
A	24	50	51	50.5	32.025	73.545	-27.1887
A	24	101	102	101.5	32.535	74.055	-27.0028
A	24	132	133	132.5	32.845	74.365	-27.2506
A	25	54	55	54.5	33.665	75.185	-27.0132
A	25	100	101	100.5	34.125	75.645	-27.2919
A	25	125	126	125.5	34.375	75.895	-27.3332
A	26	21	22	21.5	34.935	76.455	-27.5294
A	26	75	76	75.5	35.475	76.995	-27.3951
B	1	20	21	20.5	0.205	5.075	-26.5692
B	2	23	24	23.5	0.835	5.705	-26.5658
B	2	80	81	80.5	1.405	6.275	-27.137
B	2	130	131	130.5	1.905	6.775	-27.0751
B	3	44	45	44.5	2.545	7.415	-26.848
B	3	94	95	94.5	3.045	7.915	-27.0441
B	3	144	145	144.5	3.545	8.415	-27.0648
B	4	57	58	57.5	4.275	9.145	-27.8494
B	4	107	108	107.5	4.775	9.645	-27.2816
B	5	6	7	6.5	5.365	10.235	-27.8184
B	5	56	57	56.5	5.865	10.735	-27.9733
B	5	106	107	106.5	6.365	11.235	-27.9113
B	6	4	5	4.5	6.945	11.815	-28.0869
B	6	4	5	4.5	6.945	11.815	-28.0538
B	6	54	55	54.5	7.445	12.315	-27.5913
B	6	104	105	104.5	7.945	12.815	-27.9217
B	7	8	9	8.5	8.585	13.455	-27.7049
B	7	105	106	105.5	9.555	14.425	-27.963
B	8	8	9	8.5	10.185	14.915	-28.0972
B	8	58	59	58.5	10.685	15.415	-27.6842
B	8	108	109	108.5	11.185	15.915	-27.5087
B	9	13	14	13.5	11.835	16.415	-27.5397
B	9	63	64	63.5	12.335	16.915	-27.2919
B	9	113	114	113.5	12.835	17.415	-27.2919
B	10	11	12	11.5	13.415	18.035	-27.3642
B	10	61	62	61.5	13.915	18.535	-27.5913
B	10	111	112	111.5	14.415	19.035	-27.4674
B	11	10	11	10.5	15.005	19.805	-27.3229
B	11	60	61	60.5	15.505	20.305	-27.2609
B	11	110	111	110.5	16.005	20.805	-27.4032
B	12	9	10	9.5	16.595	21.325	-27.4447
B	12	59	60	59.5	17.095	21.825	-27.4447
B	12	109	110	109.5	17.595	22.325	-27.6724
B	13	8	9	8.5	18.185	22.845	-27.2893
B	13	58	59	58.5	18.685	23.345	-27.455
B	13	108	109	108.5	19.185	23.845	-27.5793
B	14	7	8	7.5	19.775	24.385	-27.4757
B	14	58	59	58.5	20.285	24.895	-27.3411
B	14	108	109	108.5	20.785	25.395	-27.5586
B	15	6	7	6.5	21.365	25.865	-27.5068
B	15	56	57	56.5	21.865	26.365	-27.4343
B	15	106	107	106.5	22.365	26.865	-27.5896
B	16	5	6	5.5	22.955	27.415	-27.3722
B	16	55	56	55.5	23.455	27.915	-27.4861
B	16	105	106	105.5	23.955	28.415	-27.3929
B	17	6	7	6.5	24.565	29.495	-27.4861
B	17	56	57	56.5	25.065	29.995	-27.6103
B	17	107	108	107.5	25.575	30.505	-27.4861
B	18	6	7	6.5	26.165	31.075	-27.4343
B	18	56	57	56.5	26.665	31.575	-27.3929
B	18	106	107	106.5	27.165	32.075	-27.3308
B	19	5	6	5.5	27.825	32.645	-27.1858
B	19	55	56	55.5	28.325	33.145	-27.2583
B	19	107	108	107.5	28.845	33.665	-26.8959
B	20	4	5	4.5	29.345	34.165	-27.4964
B	20	54	55	54.5	29.845	34.665	-27.3411
B	20	104	105	104.5	30.345	35.165	-27.4343
B	21	3	4	3.5	30.935	35.705	-27.3929
B	21	54	55	54.5	31.445	36.215	-27.6103
B	21	104	105	104.5	31.945	36.715	-27.7346
B	22	3	4	3.5	32.535	37.395	-27.5793
B	22	53	54	53.5	33.035	37.895	-27.4757
B	22	104	105	104.5	33.545	38.405	-27.6828
B	23	5	6	5.5	34.155	38.965	-27.8174
B	23	55	56	55.5	34.655	39.465	-27.6517
B	23	105	106	105.5	35.155	39.965	-27.8795
C	2	46	48	47	1.07	14.32	-26.8965
C	2	100	102	101	1.61	14.86	-26.8655
C	2	131	133	132	1.92	15.17	-26.8138
C	3	20	23	21.5	2.315	15.515	-27.2065
C	3	70	73	71.5	2.815	16.015	-27.0409
C	3	123	126	124.5	3.345	16.545	-27.1651
C	4	16	19	17.5	3.875	16.995	-27.0305
C	4	64	67	65.5	4.355	17.475	-27.3722
C	4	110	113	111.5	4.815	17.935	-27.3825
C	5	20	21	20.5	5.505	18.615	-27.424
C	5	70	71	70.5	6.005	19.115	-27.5896
C	5	120	121	120.5	6.505	19.615	-27.5896
C	6	24	25	24.5	7.145	20.095	-27.2065
C	6	78	79	78.5	7.685	20.635	-27.3101
C	6	130	131	130.5	8.205	21.155	-27.5068
C	7	29	32	30.5	8.805	21.735	-27.5378
C	7	80	83	81.5	9.315	22.245	-27.4447
C	7	125	128	126.5	9.765	22.695	-27.4757
C	8	33	36	34.5	10.445	23.365	-27.424
C	8	80	83	81.5	10.915	23.835	-27.455
C	8	120	123	121.5	11.315	24.235	-27.424
C	9	30	33	31.5	12.015	25.005	-27.2376
C	9	80	83	81.5	12.515	25.505	-27.3308
C	9	130	133	131.5	13.015	26.005	-27.2065
C	10	20	23	21.5	13.515	26.405	-27.2376
C	10	70	73	71.5	14.015	26.905	-27.1651
C	10	130	133	131.5	14.615	27.505	-27.3204
C	11	25	28	26.5	15.165	28.455	-27.2893
C	11	76	79	77.5	15.675	28.965	-27.5896
C	11	120	123	121.5	16.115	29.405	-27.631
C	12	20	23	21.5	16.715	29.855	-27.3308
C	12	70	73	71.5	17.215	30.355	-27.2686
C	12	112	115	113.5	17.635	30.775	-27.3825
C	13	20	23	21.5	18.315	31.765	-27.3411
C	13	75	78	76.5	18.865	32.315	-27.2065
C	13	135	138	136.5	19.465	32.915	-27.1755
C	14	19	22	20.5	19.905	33.245	-27.3411
C	14	70	73	71.5	20.415	33.755	-27.2686
C	14	120	123	121.5	20.915	34.255	-27.455
C	15	19	22	20.5	21.505	34.835	-27.3722
C	15	67	70	68.5	21.985	35.315	-27.4861
C	15	123	126	124.5	22.545	35.875	-27.2272
C	16	17	20	18.5	23.085	36.455	-27.3515
C	16	76	77	76.5	23.665	37.035	-27.5275
C	16	130	133	131.5	24.215	37.585	-27.2583
C	17	20	23	21.5	24.615	38.035	-27.5689
C	17	71	74	72.5	25.125	38.545	-27.6932
C	17	115	118	116.5	25.565	38.985	-27.952
C	18	23	26	24.5	26.245	39.845	-27.6517
C	18	74	77	75.5	26.755	40.355	-27.7656
C	18	141	144	142.5	27.425	41.025	-27.807
C	19	52	55	53.5	28.135	41.735	-27.3825
C	19	100	103	101.5	28.615	42.215	-27.7139
C	19	143	146	144.5	29.045	42.645	-27.4447
C	20	35	38	36.5	29.565	43.165	-27.4861
C	20	90	93	91.5	30.115	43.715	-27.2686
C	21	1	4	2.5	30.825	44.425	-27.3308
C	21	50	53	51.5	31.315	44.915	-27.4757
C	21	99	102	100.5	31.805	45.405	-27.3515
C	21	138	141	139.5	32.195	45.795	-27.4373
C	22	50	53	51.5	32.915	46.515	-27.592
C	22	106	109	107.5	33.475	47.075	-27.262
C	22	140	143	141.5	33.815	47.415	-27.6126
C	23	46	49	47.5	34.475	48.075	-27.2104
C	23	102	105	103.5	35.035	48.635	-27.6538
C	23	146	149	147.5	35.475	49.075	-27.5507
E	1	5	6	5.5	4.055	46.235	-27.0517
E	1	49	51	50	4.5	46.68	-26.271
E	1	99	100	99.5	4.995	47.175	-26.0359
E	2	5	6	5.5	5.065	47.245	-26.0149
E	2	50	51	50.5	5.515	47.695	-25.4185
E	2	100	101	100.5	6.015	48.195	-25.8084
E	2	149	150	149.5	6.505	48.685	-25.9764
E	3	3	4	3.5	6.675	48.855	-25.3484
E	3	50	51	50.5	7.145	49.325	-25.2129
E	3	100	101	100.5	7.645	49.825	-25.7904
E	3	148	149	148.5	8.125	50.305	-25.9125
E	4	5	6	5.5	8.295	50.475	-26.7662
E	4	50	51	50.5	8.745	50.925	-26.2139
E	4	100	101	100.5	9.245	51.425	-27.2583
E	4	150	150	150	9.74	51.92	-27.4489
E	5	5	6	5.5	9.925	52.105	-27.3865
E	5	10	11	10.5	9.975	52.155	-27.58
E	5	30	31	30.5	10.175	52.355	-26.6363
E	5	50	51	50.5	10.375	52.555	-26.2404
E	5	70	72	71	10.58	52.76	-26.2541
E	5	90	91.5	90.75	10.7775	52.9575	-26.253
E	5	100	100.5	100.25	10.8725	53.0525	-26.3405
E	5	110	111.5	110.75	10.9775	53.1575	-26.3755
E	5	130	131.5	130.75	11.1775	53.3575	-26.4564
E	5	148.5	150	149.25	11.3625	53.5425	-26.4852
E	6	2	4	3	11.5	53.68	-26.5997
E	6	20	21	20.5	11.675	53.855	-26.305
E	6	40	42	41	11.88	54.06	-26.4846
E	6	50	51	50.5	11.975	54.155	-26.5014
E	6	60	62	61	12.08	54.26	-26.5329
E	6	80	82	81	12.28	54.46	-26.684
E	6	100	101	100.5	12.475	54.655	-26.7006
E	6	120	121	120.5	12.675	54.855	-26.8454
E	6	120	121	120.5	12.675	54.855	-26.8454
E	6	140	141	140.5	12.875	55.055	-26.9024
E	7	5	7	6	13.17	55.35	-26.6934
E	7	25	27	26	13.37	55.55	-26.8115
E	7	45	46	45.5	13.565	55.745	-26.9195
E	7	65	66	65.5	13.765	55.945	-26.6946
E	7	85	86	85.5	13.965	56.145	-26.5991
E	7	105	106	105.5	14.165	56.345	-26.5998
E	7	125	126	125.5	14.365	56.545	-26.5797
E	7	146	147	146.5	14.575	56.755	-26.5151
E	8	1	1	1	14.75	56.93	-26.4967
E	8	10	10	10	14.84	57.02	-26.3728
E	8	20	20	20	14.94	57.12	-26.5623
E	8	30	30	30	15.04	57.22	-26.501
E	8	40	40	40	15.14	57.32	-26.3447
E	8	50	50	50	15.24	57.42	-26.3934
E	8	60	60	60	15.34	57.52	-26.4056
E	8	70	70	70	15.44	57.62	-26.323
E	8	80	80	80	15.54	57.72	-26.4061
E	8	90	90	90	15.64	57.82	-26.3416
E	8	100	100	100	15.74	57.92	-26.2389
E	8	109	109	109	15.83	58.01	-26.2668
E	8	120	120	120	15.94	58.12	-26.21
E	8	130	130	130	16.04	58.22	-26.2406
E	8	140	140	140	16.14	58.32	-26.4438
E	9	2	2	2	16.36	58.69	-26.535
E	9	10	10	10	16.44	58.77	-26.3941
E	9	20	20	20	16.54	58.87	-26.4484
E	9	30	30	30	16.64	58.97	-26.3955
E	9	40	40	40	16.74	59.07	-26.5023
E	9	50	50	50	16.84	59.17	-26.4375
E	9	60	60	60	16.94	59.27	-26.3945
E	9	70	70	70	17.04	59.37	-26.4598
E	9	75	75	75	17.09	59.42	-26.4811
E	9	80	80	80	17.14	59.47	-26.3991
E	9	85	85	85	17.19	59.52	-26.5572
E	9	90	90	90	17.24	59.57	-26.5776
E	9	95	95	95	17.29	59.62	-26.4941
E	9	100	100	100	17.34	59.67	-26.4771
E	9	105	105	105	17.39	59.72	-26.423
E	9	110	110	110	17.44	59.77	-26.4535
E	9	115	115	115	17.49	59.82	-26.4058
E	9	120	120	120	17.54	59.87	-26.2838
E	9	124.5	124.5	124.5	17.585	59.915	-26.3946
E	9	130	130	130	17.64	59.97	-26.4592
E	9	135	135	135	17.69	60.02	-26.5221
E	9	140	140	140	17.74	60.07	-26.4124
E	9	145	145	145	17.79	60.12	-26.7691
E	9	150	150	150	17.84	60.17	-26.7092
E	10	4	5	4.5	17.985	60.325	-26.3827
E	10	7	8	7.5	18.015	60.355	-26.3171
E	10	10	12	11	18.05	60.39	-26.4649
E	10	14	15	14.5	18.085	60.425	-26.6106
E	10	16.5	18	17.25	18.1125	60.4525	-26.6629
E	10	20	22	21	18.15	60.49	-26.5526
E	10	22	23	22.5	18.165	60.505	-26.553
E	10	24	25	24.5	18.185	60.525	-26.562
E	10	26	27	26.5	18.205	60.545	-26.7418
E	10	27	28	27.5	18.215	60.555	-26.473
E	10	28	29	28.5	18.225	60.565	-26.7296
E	10	30	32	31	18.25	60.59	-26.3792
E	10	32	33	32.5	18.265	60.605	-26.3397
E	10	34	35	34.5	18.285	60.625	-26.4503
E	10	36	37	36.5	18.305	60.645	-26.3346
E	10	37	38	37.5	18.315	60.655	-26.5117
E	10	38	39	38.5	18.325	60.665	-26.3563
E	10	40	41	40.5	18.345	60.685	-26.2151
E	10	42	43	42.5	18.365	60.705	-26.1287
E	10	44	45	44.5	18.385	60.725	-26.2262
E	10	46	47	46.5	18.405	60.745	-26.2565
E	10	47	48	47.5	18.415	60.755	-26.0903
E	10	48	49	48.5	18.425	60.765	-26.17
E	10	50	51	50.5	18.445	60.785	-26.2271
E	10	52	53	52.5	18.465	60.805	-26.4235
E	10	54	55	54.5	18.485	60.825	-26.2527
E	10	56	57	56.5	18.505	60.845	-26.273
E	10	57	58	57.5	18.515	60.855	-26.3404
E	10	58	59	58.5	18.525	60.865	-26.5192
E	10	60	62	61	18.55	60.89	-26.5918
E	10	62	63	62.5	18.565	60.905	-26.3944
E	10	64	65	64.5	18.585	60.925	-26.5141
E	10	65	66	65.5	18.595	60.935	-26.6042
E	10	66	67	66.5	18.605	60.945	-26.6786
E	10	67	68	67.5	18.615	60.955	-26.5817
E	10	68	69	68.5	18.625	60.965	-26.4675
E	10	70	72	71	18.65	60.99	-26.4314
E	10	71	72	71.5	18.655	60.995	-26.5177
E	10	72	72	72	18.66	61	-26.5138
E	10	73	73	73	18.67	61.01	-26.3877
E	10	73.5	74	73.75	18.6775	61.0175	-26.3423
E	10	74	74	74	18.68	61.02	-26.2741
E	10	75	75	75	18.69	61.03	-26.3441
E	10	76	76	76	18.7	61.04	-26.3436
E	10	77	77	77	18.71	61.05	-26.4901
E	10	78	78	78	18.72	61.06	-26.3445
E	10	79	79	79	18.73	61.07	-26.4313
E	10	80	80	80	18.74	61.08	-26.4452
E	10	81	81	81	18.75	61.09	-26.3847
E	10	82	82	82	18.76	61.1	-26.5427
E	10	83	83	83	18.77	61.11	-26.4498
E	10	84	85	84.5	18.785	61.125	-26.4176
E	10	85	86	85.5	18.795	61.135	-26.5804
E	10	86	87	86.5	18.805	61.145	-26.4367
E	10	87	88	87.5	18.815	61.155	-26.3057
E	10	88	89	88.5	18.825	61.165	-26.5088
E	10	89	90	89.5	18.835	61.175	-26.4084
E	10	90	91	90.5	18.845	61.185	-26.4275
E	10	91	92	91.5	18.855	61.195	-26.5502
E	10	92	93	92.5	18.865	61.205	-26.5744
E	10	93	94	93.5	18.875	61.215	-26.3899
E	10	94	95	94.5	18.885	61.225	-26.5729
E	10	95	96	95.5	18.895	61.235	-26.4169
E	10	96	97	96.5	18.905	61.245	-26.4333
E	10	97	98	97.5	18.915	61.255	-26.6947
E	10	98	99	98.5	18.925	61.265	-26.5642
E	10	99	100	99.5	18.935	61.275	-26.746
E	10	100	101	100.5	18.945	61.285	-26.6972
E	10	101	102	101.5	18.955	61.295	-26.6527
E	10	102	103	102.5	18.965	61.305	-26.8049
E	10	103	104	103.5	18.975	61.315	-26.5782
E	10	104	105	104.5	18.985	61.325	-26.6981
E	10	105	106	105.5	18.995	61.335	-26.4673
E	10	106	107	106.5	19.005	61.345	-26.7781
E	10	107	108	107.5	19.015	61.355	-26.6984
E	10	108	109	108.5	19.025	61.365	-26.7648
E	10	109	110	109.5	19.035	61.375	-26.8222
E	10	110	110	110	19.04	61.38	-26.9145
E	10	110.5	110.5	110.5	19.045	61.385	-26.9573
E	10	111	111	111	19.05	61.39	-26.822
E	10	111.5	111.5	111.5	19.055	61.395	-26.927
E	10	112	112	112	19.06	61.4	-26.9384
E	10	112.5	112.5	112.5	19.065	61.405	-26.9683
E	10	113.5	113.5	113.5	19.075	61.415	-27.0239
E	10	114	114	114	19.08	61.42	-26.9095
E	10	114.5	114.5	114.5	19.085	61.425	-26.842
E	10	115	115	115	19.09	61.43	-27.0235
E	10	115.5	115.5	115.5	19.095	61.435	-26.9819
E	10	116	116	116	19.1	61.44	-26.9181
E	10	116.5	116.5	116.5	19.105	61.445	-26.7518
E	10	117	117	117	19.11	61.45	-27.053
E	10	117.5	117.5	117.5	19.115	61.455	-27.2241
E	10	118	118	118	19.12	61.46	-27.1834
E	10	118.5	118.5	118.5	19.125	61.465	-27.2143
E	10	119	119	119	19.13	61.47	-27.2476
E	10	119.5	119.5	119.5	19.135	61.475	-26.9952
E	10	120	120	120	19.14	61.48	-27.3156
E	10	120.5	120.5	120.5	19.145	61.485	-27.5162
E	10	121	121	121	19.15	61.49	-27.393
E	10	121.5	121.5	121.5	19.155	61.495	-27.3529
E	10	122	122	122	19.16	61.5	-27.3127
E	10	122.5	122.5	122.5	19.165	61.505	-27.4806
E	10	123	123	123	19.17	61.51	-27.0878
E	10	123.5	123.5	123.5	19.175	61.515	-26.7025
E	10	124	124	124	19.18	61.52	-26.8449
E	10	124.5	124.5	124.5	19.185	61.525	-26.6198
E	10	125	125	125	19.19	61.53	-26.485
E	10	125.5	125.5	125.5	19.195	61.535	-26.888
E	10	126	126	126	19.2	61.54	-26.8184
E	10	126.5	126.5	126.5	19.205	61.545	-26.6182
E	10	127	127	127	19.21	61.55	-26.4492
E	10	127.5	127.5	127.5	19.215	61.555	-26.4473
E	10	128	128	128	19.22	61.56	-26.6708
E	10	128.5	128.5	128.5	19.225	61.565	-26.4335
E	10	129	129	129	19.23	61.57	-26.3199
E	10	129.5	129.5	129.5	19.235	61.575	-26.2184
E	10	130	130	130	19.24	61.58	-26.457
E	10	135	136	135.5	19.295	61.635	-26.4191
E	10	140	141	140.5	19.345	61.685	-26.5469
E	10	149	150	149.5	19.435	61.775	-26.5193
E	11	1	1	1	19.58	62.07	-26.8556
E	11	10	10	10	19.67	62.16	-26.9914
E	11	20	20	20	19.77	62.26	-26.6219
E	11	30	30	30	19.87	62.36	-26.8811
E	11	40	40	40	19.97	62.46	-26.8526
E	11	50	50	50	20.07	62.56	-27.193
E	11	60	60	60	20.17	62.66	-26.7968
E	11	70	70	70	20.27	62.76	-26.7152
E	11	80	80	80	20.37	62.86	-26.9184
E	11	90	90	90	20.47	62.96	-26.8525
E	11	98.5	98.5	98.5	20.555	63.045	-26.8302
E	12	20	20	20	20.89	63.49	-26.5498
E	12	40	40	40	21.09	63.69	-26.8532
E	12	60	60	60	21.29	63.89	-26.7379
E	12	76	76	76	21.45	64.05	-26.6971
E	12	80	81	80.5	21.495	64.095	-26.5292
E	12	100	100	100	21.69	64.29	-26.6607
E	12	120	120	120	21.89	64.49	-26.7049
E	12	140	140	140	22.09	64.69	-26.3894
E	13	10	10	10	22.33	65.08	-26.6344
E	13	30	30	30	22.53	65.28	-26.6403
E	13	50	50	50	22.73	65.48	-26.7275
E	13	69.5	70	69.75	22.9275	65.6775	-26.8838
E	13	90	91.5	90.75	23.1375	65.8875	-26.8914
E	13	110	110	110	23.33	66.08	-26.7254
E	13	130	130	130	23.53	66.28	-26.6907
E	13	150	150	150	23.73	66.48	-26.7523
E	14	25	25.5	25.25	24.1125	67.9425	-26.7229
E	14	50	50.5	50.25	24.3625	68.1925	-26.6319
E	14	75	75.5	75.25	24.6125	68.4425	-26.7416
E	14	100	100.5	100.25	24.8625	68.6925	-26.9424
E	14	125	125.5	125.25	25.1125	68.9425	-27.2137
E	14	150	150.5	150.25	25.3625	69.1925	-27.3088
E	15	15	15.5	15.25	25.5425	69.6925	-27.4361
E	15	40	40.5	40.25	25.7925	69.9425	-27.2999
E	15	65	65.5	65.25	26.0425	70.1925	-27.2003
E	15	90	91.5	90.75	26.2975	70.4475	-26.938
E	15	115	115.5	115.25	26.5425	70.6925	-27.1381
E	15	137	137.5	137.25	26.7625	70.9125	-27.2412
E	16	10	10.5	10.25	26.9425	71.1425	-26.8021
E	16	30	30.5	30.25	27.1425	71.3425	-26.7996
E	16	50	50.5	50.25	27.3425	71.5425	-26.8721
E	16	70.5	71	70.75	27.5475	71.7475	-26.9875
E	16	88.5	90	89.25	27.7325	71.9325	-27.0908

## Sheet: TABLE A7
APPENDIX TABLE 7. BIOSTRATIGRAPHIC RANGES OF CALCAREOUS NANNOPLANKTON TAXA (HOLE A)
Core	Section	Sample depth	N. romeinii	N. parvulum	Hornibrooking sp.	Z. sigmoides	C. reinhardtii	W. barnesiae	M. inversus	C. ultimus	N. primitivus	Ne. fossus	N. denticulatus	N. digitosus	N. perfectus	N. cruciatus	L .duocavus	Calciosolenia sp.	Cervisiella spp.	Braarudosphaera spp.	Micrantholithus spp.	B. sparsus	C. primus	C. intermedius	C. cavus	C. pelagicus	E. subpertusa	Praeprinsius spp.	P. dimorphosus	P. tenuiculus	P. bisulcus	Prinsius sp.	F. petalosa	REWORKING	G. nanum	N. frequens	Biscutum spp.	M. prinsii	P. regularis	Abundance	Preservation
		(cm)
1	1	84-86	?	?		F					R					R			C	R			R	F	F		C			VA				VR						A
2	1	76-77				F	R				R		R						F	R			F	F			F			VA	R			VR						A
3	1	92-93	?	?		R	R	R			R		R		R				F	R			F	R			R			VA										A
4	1	71-72	F	F		F								R		R			R				F	R	R	R	F			??				VR						A
5	1	51-52	R	R		F			R				R	R	R	R			F				C	R	R		F			VA			R	VR						A
7	1	61-62	R	R		F			R		R		R	R	R	R			F				C	R		R	F			A				VR						A	M
8	1	81-82	R	R		F					R			R	R	R			C				F	F		R	F	F		A			F	VR						A	M
9	1	41-42				F			R		R			R		R			C				F	F			C	F		A			R	VR						A	M
10	1	0	F	F		F								R	R	R			R	R			F	C	F		F	A		C			F-C	VR						A	M
11	3	0	F	F		F			R		R			R	R	R			C	R			F	F	R		F	C		F			F	VR						A	M
12	1	2 to 3	R	F	R		R	R											F	R			F	F	R	R	F	VA		C			C	VR						A	M
13	1	118	F	F		R		R		R	R	R							C	R	R		A	F	F								F	VR						A	M
14	1	40	A	A		R	R	R	R	F	R	R						R	F	F			C		F									VR						A	M
14	1	72-74	R	R		R	R	R		R							R		C	R	R		2											VR						C	M
14	1	84	C	C		R	R	R		R									F	R			1											VR						A	M
14	2	0	A	A		R		R	R	R									C	R			2					1						R						A	M
15	1	0-1
15	1	1 to 2	A	A		R	R	R									R	R	F	R	R		R											R						A	M
15	1	8 to 12
15	1	15-16
15	1	20-21	A	A		R	R	R	R										C	R	R		1		1									VR	R					A	M
15	1	25-26
15	1	29-32
15	1	35-36
15	1	41-42	A	A		R	R	R										R	F	R	R		3											VR		R				A	M
15	1	45-46
15	1	50-51	A	A		R	R	R	R								R		A	R	R		3											R						A	M
15	1	55-56
15	1	60-61	A	C			R	R									R		F	R			1											VR		R				A	M
15	1	65-66
15	1	70-71	A	C		R	R	R											C	R	R		3											VR						A	M
15	1	74-75
15	1	78-79	A	F		R	R	R		R									C	F	R		1											VR		R				A	M
15	1	83-84
15	1	88-89	A	C			R			R								R	C	R	R		3											VR						A	M
15	1	94-95	A	F		R	R												A	R	R		1		1									VR						A	M
15	1	98-99	VA	C		R	R												A	R			1											VR	R					A	M
15	1	102-103	A	R			R												C	R	R		1											VR	R				R	A	M
15	1	110-111	C	R			R												C	R			?											R		R				C	P
16	1	0-1
16	1	1-2	A	?		R	R												C	R														R
16	1	2-3
16	1	3-4
16	1	4-5	A	?		R	R												C	R														R
16	1	5-6
16	1	6-7
16	1	7-8
16	1	8-9
16	1	9-10	A	?		R	R												C	R														R		R
16	1	10-11
16	1	11-12
16	1	12-13
16	1	13-14
16	1	14-15	A	?		R	R												C	R														R
16	1	15-17
16	1	16-17
16	1	17-18
16	1	18-19
16	1	19-20
16	1	19.5-21	A	R		R	R			R									A	R	R		?											R
16	1	21-22
16	1	22-23
16	1	23-24
16	1	24-25	A	?		R	R												C	R														R	R
16	1	25-26
16	1	26-27
16	1	27-28
16	1	28-29
16	1	29-30	A	R		R	R			R									C	R														R
16	1	30-31
16	1	31-32
16	1	32-33
16	1	33-34
16	1	34-35	A				R												C															VR
16	1	35-36
16	1	36-37
16	1	37-38
16	1	38-39
16	1	39-40
16	1	40-41	A	R		R	R			R									C	R														R
16	1	41-42
16	1	42-43
16	1	43-44
16	1	44-45	A	?		R	R												C	R
16	1	45-46
16	1	46-47
16	1	47-48
16	1	48-49
16	1	49-50
16	1	50-51	?			R													C															VR			R
16	1	51-52
16	1	52-53
16	1	53-54
16	1	54-55	R	?		R				R										C														VR
16	1	55-56
16	1	56-57.5
16	1	57-58
16	1	58-59
16	1	59-60	C			R	R												C															R						C	M
16	1	60-61
16	1	61-62
16	1	62-63
16	1	63-64
16	1	64-65
16	1	65-66																																R						R	M
16	1	66-67
16	1	67-68
16	1	68-69
16	1	69-70	?																															R		R				F	M
16	1	70-71
16	1	71-72
16	1	72-73
16	1	73-74
16	1	74-75	?			R													C															VR
16	1	75-76
16	1	76-77
16	1	77-78
16	1	78-79
16	1	79-80					R													C														VR
16	1	80-81
16	1	81-82
16	1	82-83
16	1	83-84
16	1	84-85
16	1	85-86
16	1	86-87
16	1	87-88
16	1	88-89
16	1	89-90
16	1	90-91
16	1	91-92
16	1	92-93
16	1	93-94
16	1	94-95
16	1	95-96
16	1	96-97
16	1	97-98
16	1	98-99
16	1	99-100
16	1	100-101				R	R												R																		VR	R
16	1	101-102
16	1	102-103
16	1	103-104
16	1	104-105
16	1	105-106
16	1	106-107
16	1	107-108
16	1	108-109
16	1	109-110
16	1	110-111																																				R
16	1	111-112
16	1	112-113
16	1	113-114
16	1	114-115
16	1	115-116
16	1	116-117
16	1	117-118
16	1	118-119
16	1	119-120																																			A	R
16	1	120-121
16	1	121-122
16	1	122-123
16	1	123-124
16	1	124-125
16	1	125-126
16	1	126-127
16	1	127-128
16	1	128-129
16	1	129-130
16	1	130-131																																			F	R		A	M
16	1	131-132
16	1	132-133
16	1	133-134
16	1	134-135
16	1	135-136
16	1	136-137
16	1	137-138
16	1	138-139
16	1	139-140
16	1	140-141																																						A	M
16	1	141-142
16	1	142-143
16	1	143-144
16	1	144-145
16	1	145-146
16	1	146-147
16	1	147-148
16	1	148-149
16	1	149-150
16	1	150-151																																						A	M
Note: Letters in table represent qualitative abundances, with VA= very abundant, A= abundant, C= common, F= few, R= rare and VR= very rare. Preservation is P= Poor, M=moderate, or G=good.

## Sheet: TABLE A8
APPENDIX TABLE 8. BIOSTRATIGRAPHIC RANGES OF CALCAREOUS NANNOPLANKTON TAXA (HOLE C)
Core	Section	Sample depth	N. romeinii	N. parvulum	Hornibrooking sp.	Z. sigmoides	C. reinhardtii	W. barnesiae	M. inversus	C. ultimus	N. primitivus	Ne. fossus	N. denticulatus	N. digitosus	N. perfectus	N. cruciatus	L. duocavus	Calciosolenia sp.	Ne. neocrassus	Neocredpiolithus sp.	Cervisiella spp.	Braarudosphaera spp.	Micrantholithus spp.	M. attenuatus	B. sparsus	C. primus	C. intermedius	C. cavus	C. pelagicus	E. subpertusa	Praeprinsius spp.	P. tenuiculus	P. dimorphosus	P. bisulcus	Prinsius sp.	F. petalosa	REWORKING	Abundance	Preservation
		(cm)
2	1	100-101	F-C	R	R	F		R			R		R		R				R		F					F	F	R	R	R	VA	VA				F	VR	A	M
3	1	70-73	R	R	R			R					R		R						C					F	F	R		F	VA	A						A	M
4	1	110-113	R	R	R	R		R			R				R	R					F		R			F	F			R	VA	VA				F	VR	A	M
5	1	70-71	R		R	R		R							R	R					F					R	F	F	R	F	VA	VA				R	VR
6	1	78-79		R	R			R			R				R	R					F					F	F	R	R	F	VA	VA				R	VR
7	1	80-83	R	R	R	R			R		R				R	R					F					R	F	R	R	F	VA	VA				R	VR	A	M
8	1	80-83	R	R	R	R		R					R		R						F	R				R	F	F	R	F	VA	VA				R	VR	A	M
9	1	80-83	R			F					R			R	R					R	F	R					R	R	R		VA					R	VR	A	G
10	1	70-73	F	R	R	F		R					R	R	R						F					F	F	R	R	F	VA	A					VR	A	G
11	1	70-73	R	R	R	F		R			R				R	R					F	R				F	R	R	R	F	VA	A				F	VR
12	1	70-73	R		R	R		R							R					R	F					F	F	R	R	F	VA	C				VA	VR	A	M
13	1	76-77	C	R		R	R								R											F	F	R		F	A	F				VA	VR
14	1	120-123	F	R	R	R									R											R	R	F		F	VA	C				VA	VR
15	1	123-126	F	F	R	R									R									R		F	F	F		R	VA	F				VA	VR	A	M
16	1	131.5-133	F	R		F		R			R			R					R	R				R		F	F	F	R	R	VA	F				VA	VR	A	G
17	1	116-118	C	R		F		R						R							C	R		R			F	C	R	R	VA					VA	VR	A	G
18	1	142.5-143	A	C		R		R			R			R							F	R				F	F	C	R	R	VA					VA	VR	A	M
19	1	143-146	A	C		R	R	R	R		R			R		R					C	R				F	R	F		R	VA					VA	VR	A
20	1	91.5-92	C	F				R			R			R							C	R				F	R	F	?	R	A					VA	VR	A	G
21	1	138-141	A	A		R	R				R			R						R	C	R				F	R	F		R	A					VA	VR
22	1	141.5-142	A	F		R		R			R			R						R	A	R		R		F	R	F	?	R	A					A	VR	A	G
23	1	147-147.5	C	F		R					R			R							C	R		R		F	F	F	?	?	C					VA	VR	A	G
Note: Letters in table represent qualitative abundances, with VA= very abundant, A= abundant, C= common, F= few, R= rare and VR= very rare. Preservation is P= Poor, M=moderate, or G=good.

## Sheet: TABLE A9
APPENDIX TABLE 9. BIOSTRATIGRAPHIC RANGES OF CALCAREOUS NANNOPLANKTON TAXA (HOLE E)
Core	Section	Sample depth	N. romeinii	N. parvulum	Large Biscutum sp.	Hornibrooking sp.	Z. sigmoides	C. reinhardtii	W. barnesiae	M. inversus	C. ultimus	N. primitivus	Ne. fossus	N. denticulatus	N. digitosus	N. perfectus	N. cruciatus	L. duocavus	Calciosolenia sp.	Neocredpiolithus sp.	Cervisiella spp.	Braarudosphaera spp.	Micrantholithus spp.	M. attenuatus	B. sparsus	G. fluckegeri	C. primus	C. intermedius	C. pelagicus	E. subpertusa	Praeprinsius spp.	P. tenuiculus	P. martinii	P. dimorphosus	P. bisulcus	Prinsius sp.	F. petalosa	REWORKING	P. stoveri	G. nanum	N. frequens	Biscutum spp.	M. prinsii	P. regularis	Abundance	Preservation
		(cm)
4	1	10	R	R		R	F									R					C	R		R			F	C	F	C	A	A					VA	R							A	G
4	1	50	R				R								R	R					F	R							R	F	VA	C					A	R							A	M
4	1	70				R	R									R					F						F	R	F	R	C	A					C	R							A	G
4	1	90																												F		R
4	1	110		R			R								R	R						R		R			F	R	R	R	A	R					VA	R							A	G
4	1	130		R			R				R			R	R					R	F	R					F	F	R		VA	R					VA	R							A	G
4	1	150	R	F			R	R						R	R	R	R			R	C	R					R	F	R		VA						VA	R							A	G
5	1	5 to 6		C																							A	F	C	F	F						VA	R								M
5	1	10	C	C			R	R		R	R	R		R		R				R	VA	R					R	R	R		A						VA	R							A	M
5	1	30	R	R			R								R	R	R			R	F	R			R		F		R		F						F	R							A	M
5	1	35-36		C																							A	F	C	R							VA	R								M
5	1	45-46		VA																							F		VR		R						VR	R								M
5	1	50		F																		R																							F	P
5	1	55-56		A																							F										R	R								P
5	1	65-66		A																							A	VR	VR		R						F	R								M
5	1	70	F	F							R				R		R	R			F	R					R		R		A							R	R						A	M
5	1	75-76		VA																							C		VR								R	F								M
5	1	85-86		VA																							F	R	R	R	R						R									M
5	1	90					R											R			R	R					R		R		R								R						F	P
5	1	95-96		VA																							C		VR		VR						VR									M
5	1	105-106		VA																							F	1?	VR		R						VR									M
5	1	110	F	C		R	R	R		R	R						R	R			A	F					R				A							R	R						A	G
5	1	115-116		VA																							F		VR		R															M
5	1	125-126		VA																							F	R	R	VR	R						R									P
5	1	135-136		VA																							F	2	F	VR	R						F									M
5	1	145-146		VA																							F		R		R						R									P
5	1	150	R	A			R								R			R			R	R				R	1				C								R						A	G
6	1	10	C	VA			R	R						R		R		R			A	F			R		F		VR		C							F								G
6	1	70	C	VA			R				R			R				R			F	R					R		R		R														A	G
6	1	110	R	VA			R				R	R					R	R		R	F	R					F	R	VR		F							R							A	G
6	1	150	C	VA			R				R			R		R		R			F	R					A		R		R								R						A	M
7	1	10	A	VA	R		R	R		R	R	R					R	R			C	F			R		F	1?	R		VR								R						A	G
7	1	50	F	A			R	R			R							R			A	F																	R						A	G
7	1	110	F	A			R				R				R						F	F					1																		A	G
7	1	120-121		VA																							C		F																	M
7	1	130																									1
7	1	140-141		VA																							C		R																	M
7	1	150																									1
8	1	0		VA																							F		1	1?
8	1	10	F	VA	R												R	R		R	A	F					F		Co									R	R						A	G
8	1	30	F	A			R				R							R			C	F					F		Co										R						A	M
8	1	50	C	C		R	R				R							R			C	F					F												R						A	M
8	1	70	F	C							R										C	R				R	F												R						C	M
8	1	90	R	F			R	R										R			F	R					F																		F	M
8	1	130	R	A																	R	R					R																		R	M
9	1	10	F		R		R	R	R	R											C	R																R	R						R	M
9	1	30	C	R?	R		R		R												C	R				R	Co											R	R						C	M
9	1	50	R	R?	R				R												C	R				R												R	R						R	P
9	1	70					R		R												R																	R							F	P
9	1	90	C	?	R		R	R	R												F	R				R	1											R	R						C	M
9	1	130	C																								1		Co
9	1	140	C																								1	Co	Co		Co
10	1	10	F				R		R		R										A	R															Co	R	R						C	G
10	1	30	F		R		R		R												C						VR		Co									R							C	G
10	1	50
10	1	70	F																		F																								C	G
10	1	90	?																		R																	R							R
10	1	120					F																															R
Note: Letters in table represent qualitative abundances, with VA= very abundant, A= abundant, C= common, F= few, R= rare, VR= very rare, Co= downhole contaminated. Preservation is P= Poor, M=moderate, or G=good.

## Sheet: TABLE A10
APPENDIX TABLE 10. BIOSTRATIGRAPHIC RANGES OF PLANKTIC FORAMINIFERA TAXA (HOLE A)
Sample ID	Biozone	Abathomphalus intermedius	Abathomphalus mayaroensis	Archaeoglobigerina cretacea	Chiloguembelina midwayensis	Chiloguembelina morsei	Cretaceous spp.	Eoglobigerina edita	Eoglobigerina eobulloides	Gansserina wiedenmayeri	Globanomalina archeocompressa	Globanomalina planocompressa	Globigerinelloides alvarevi	Globigerinelloides asper	Globigerinelloides subcarinata	Globotruncana aegyptica	Globotruncana arca	Globotruncana dupeublei	Globotruncana esnehensis	Globotruncanella spp.	Globotruncanella minuta	Globotruncanella petaloidea	Globotruncanita spp.	Globotruncanita conica	Globotruncanita insignis	Globotruncana spp.	Globotruncanita stuartiformis	Guembelitria cretacea	Hedbergella spp.	Hedbergella holmdelensis	Hedbergella monmouthensis	Heterohelix globulosa	Heterohelix labellosa	Heterohelix navarroensis	Heterohelix punctulata	Laeviheterohelix glabrans	Parasubbotina pseudobulloides	Parasubbotina aff. pseudobulloides	Parvularugoglobigerina alabamens	Parvularugoglobigerina eugubina	Planoglobulina glabrata	Plummerita hantkeninoides	Praemurica pseudoinconstans	Praemurica taurica	Pseudoguembelina costulata	Pseudoguembelina palpebra	Pseudotextularia elegans	Pseudotextularia nuttalli	Racemiguembelina fructicosa
El Kef 1A 14R, 38-42cm	P1a				x	x		x	x		x	x																x									x		x				x	x
El Kef 1A 14R, 49-53cm	P alpha				x	x		x	x		x	x																x									x			x			x	x
El Kef 1A 14R, 72-77cm	P alpha				x	x		x	x		x	x																x												x				x
El Kef 1A 15R, 1-4cm	P alpha					x		x	x		x																	x												x				x
El Kef 1A 15R, 20-24cm	P alpha					x		x	x		x																	x												x				x
El Kef 1A 15R, 50-54cm	P alpha					x		x	x		x																	x												x				x
El Kef 1A 15R, 65-69cm	P alpha					x		x	x		x																	x												x				x
El Kef 1A 15R, 74-78cm	P alpha					x		x	x		x																	x												x				x
El Kef 1A 15R, 88-92cm	P alpha					x		x	x		x																	x												x				x
El Kef 1A 15R, 102-106cm	P alpha					x		x	x		x																	x												x				x
El Kef 1A 15R, 110-113cm	P alpha					x			x		x																	x												x				x
El Kef 1A 16R, 1-2cm	P alpha					x			x		x																	x												x				x
El Kef 1A 16R, 2-3cm	P alpha					x			x		x																	x												x				x
El Kef 1A 16R, 4-5cm	P alpha					x			x		x																	x												x				x
El Kef 1A 16R, 5-6cm	P alpha					x			x		x																	x												x				x
El Kef 1A 16R, 7-8cm	P alpha					x	x Rw		x		x																	x												x				x
El Kef 1A 16R, 8-9cm	P alpha					x			x		x																	x												x				x
El Kef 1A 16R, 10-11cm	P alpha					x			x		x																	x												x				x
El Kef 1A 16R, 11-12cm	P alpha					x			x		x																	x												x				x
El Kef 1A 16R, 13-14cm	P alpha					x			x		x																	x												x				x
El Kef 1A 16R, 14-14cm	P alpha					x			x		x																	x												x				x
El Kef 1A 16R, 20-21cm	P alpha					x			x		x																	x												x				x
El Kef 1A 16R, 21-22cm	P alpha					x			x		x																	x												x				x
El Kef 1A 16R, 23-24cm	P alpha					x ?			x		x																	x												x				x
El Kef 1A 16R, 24-25cm	P alpha								x		x																	x												x				x
El Kef 1A 16R, 28-29cm	P alpha								x		x																	x												x				x
El Kef 1A 16R, 29-30cm	P alpha								x		x																	x												x				x
El Kef 1A 16R, 31-32cm	P alpha						x Rw		x		x																	x												x				x
El Kef 1A 16R, 33-34cm	P alpha						x Rw		x		x																	x												x				x
El Kef 1A 16R, 36-37cm	P alpha								x		x																	x												x				x
El Kef 1A 16R, 37-38m	P alpha								x		x																	x												x				x
El Kef 1A 16R, 40-41cm	P alpha						x Rw		x																			x											x	x
El Kef 1A 16R, 41-42cm	P0								x		x																	x										x ?	x					x
El Kef 1A 16R, 43-44cm	P0						x Rw		x		x																	x		x ?														x
El Kef 1A 16R, 45-46cm	P0								x																			x			x								x
El Kef 1A 16R, 50-51cm	P0								x																			x											x
El Kef 1A 16R, 61-62cm	P0						x Rw																					x
El Kef 1A 16R, 70-71cm	P0						x Rw																					x
El Kef 1A 16R, 80-81cm	P0						x Rw																					x
El Kef 1A 16R, 91-92cm	P0						x Rw																					x
El Kef 1A 16R, 99-100cm	P0						x Rw																					x
El Kef 1A 16R, 103-106cm	P. hantkeninoides	x	x										x	x	x	x	x		x	x	x	x	x	x		x	x	x		x	x	x	x	x	x	x					x	x			x	x	x	x	x
El Kef 1A 16R, 105-106cm	P. hantkeninoides	x	x										x	x	x	x	x		x	x	x	x	x	x		x	x	x		x	x	x	x	x	x	x					x	x			x	x	x	x	x
El Kef 1A 16R, 108-109cm	P. hantkeninoides	x	x										x	x	x	x	x		x	x	x	x	x	x		x	x	x		x	x	x	x	x	x	x					x	x			x	x	x	x	x
El Kef 1A 16R, 109-110cm	P. hantkeninoides	x	x										x	x	x	x	x		x	x	x	x	x	x		x	x	x		x	x	x	x	x	x	x					x	x			x	x	x	x	x
El Kef 1A 16R, 111-112cm	P. hantkeninoides	x	x							x ?			x	x	x	x	x		x	x	x	x	x	x		x	x	x		x	x	x	x	x	x	x					x	x			x	x	x	x	x
El Kef 1A 16R, 115-116cm	P. hantkeninoides									x			x	x	x	x	x		x	x	x	x	x	x		x	x	x		x	x	x	x	x	x	x					x				x	x	x	x	x
El Kef 1A 16R, 117-118cm	P. hantkeninoides									x			x	x	x	x	x		x	x	x	x	x	x		x	x	x		x	x	x	x	x	x	x					x				x	x	x	x	x
El Kef 1A 16R, 120-121cm	P. hantkeninoides	x	x	x						x			x	x	x	x	x		x	x	x	x	x	x		x	x	x		x	x	x	x	x	x	x					x				x	x	x	x	x
El Kef 1A 16R, 127-128cm	P. hantkeninoides	x	x	x						x			x	x	x	x	x		x	x	x	x	x	x		x	x	x		x	x	x	x	x	x	x					x				x	x	x	x	x
El Kef 1A 16R, 131-132cm	P. hantkeninoides	x	x	x						x			x	x	x	x	x		x	x	x	x	x	x		x	x	x	x			x	x	x	x	x					x				x	x	x	x	x
El Kef 1A 16R, 136-137cm	P. hantkeninoides	x	x	x						x			x	x	x	x	x		x	x	x	x	x	x		x	x	x	x		x	x	x	x	x	x					x				x	x	x	x	x
El Kef 1A 16R, 140-141cm	P. hantkeninoides	x	x	x						x			x	x	x	x	x		x	x	x	x	x	x		x	x	x	x		x	x	x	x	x	x					x				x	x	x	x	x
El Kef 1A 16R, 146-147cm	P. hantkeninoides	x		x						x			x	x	x	x	x	x ?	x	x	x	x	x	x		x	x	x	x		x	x	x	x	x	x					x				x	x	x	x	x
El Kef 1A 17R, 49-52cm	P. hantkeninoides	x		x						x			x	x	x	x	x	x	x	x	x	x	x	x	x	x	x	x	x		x	x	x	x	x	x					x				x	x	x	x	x
El Kef 1A 17R, 80.5-83.5cm	P. hantkeninoides	x		x						x			x	x	x	x	x	x	x	x	x	x	x	x	x	x	x	x	x		x	x	x	x	x	x					x				x	x	x	x	x
El Kef 1A 17R, 115-118cm	P. hantkeninoides	x	x	x						x			x	x	x	x	x	x	x	x	x	x	x	x	x	x	x	x	x		x	x	x	x	x	x					x	x			x	x	x	x	x
El Kef 1A 17R, 143.5-145.5cm	P. hantkeninoides	x	x	x						x			x	x	x	x	x	x	x	x	x	x	x	x	x	x	x	x	x		x	x	x	x	x	x					x				x	x	x	x	x
[truncated: 13 more columns]

[truncated: 2 more sheets: TABLE A11, TABLE A12]
